## **Prenatal alcohol exposure programs offspring disease: Impacts on metabolic health and dietary preference in a rat model of acute exposure**

**Tam M T Nguyen<sup>1</sup>, Sarah E Steane<sup>1</sup>, Karen M Moritz<sup>1,2</sup>, Lisa K Akison<sup>1,2</sup>**

<sup>1</sup>School of Biomedical Sciences, The University of Queensland, St Lucia, QLD, Australia.

<sup>2</sup>Child Health Research Centre, The University of Queensland, South Brisbane, QLD, Australia.

***Corresponding Author: Lisa Akison***

***Address:*** Child Health Research Centre, The University of Queensland, Room 408, Centre for Children's Health Research (CCHR), 62 Graham St, South Brisbane, QLD 4101, AUSTRALIA

***Phone:*** +61 7 3069 7511

***Email:*** [l.akison@uq.edu.au](mailto:l.akison@uq.edu.au)

***Running Title:*** Prenatal alcohol exposure and offspring metabolism

### **Key points summary**

- Prenatal alcohol exposure has the potential to affect fetal development and program chronic disease in offspring.
- Previous preclinical models typically use high, chronic doses of alcohol throughout pregnancy to examine effects on offspring, particularly on the brain and behaviour.
- In this study we use a rat model of moderate, acute, prenatal alcohol exposure to determine if this can be detrimental to maintenance of glucose homeostasis in adolescent and adult offspring.
- Although female offspring were relatively unaffected, there was evidence of insulin resistance in 6-month old male offspring exposed to prenatal alcohol, suggestive of a pre-diabetic state
- This result suggests that even a relatively low-dose, acute exposure to alcohol during pregnancy can still program metabolic dysfunction in a sex-specific manner.

1 **Abstract**

2 Alcohol consumption is highly prevalent amongst women of reproductive age. Given  
3 that approximately 50% of pregnancies are unplanned, alcohol has the potential to affect  
4 fetal development and program chronic disease in offspring. We examined the effect of  
5 an acute but moderate prenatal alcohol exposure (PAE) on glucose metabolism, lipid  
6 levels and dietary preference in adolescent and/or adult rat offspring. Pregnant Sprague-  
7 Dawley rats received an oral gavage of ethanol (1g/kg maternal body weight, n=9 dams)  
8 or an equivalent volume of saline (control, n=8 dams) at embryonic days 13.5 and 14.5.  
9 PAE resulted in a blood alcohol concentration of 0.05-0.06% 1h post-gavage in dams.  
10 Fasting blood glucose concentration was not affected by PAE at any age, nor were  
11 blood glucose levels during a glucose tolerance test (GTT) ( $P>0.5$ ). However, there was  
12 evidence of insulin resistance in PAE male offspring at 6 months of age, with  
13 significantly elevated fasting plasma insulin ( $P = 0.001$ ), a tendency for increased first  
14 phase insulin secretion during the GTT ( $P = 0.06$ ) and impaired glucose clearance  
15 following an insulin challenge ( $P = 0.01$ ). This was accompanied by alterations in  
16 protein kinase B (AKT) signalling in adipose tissue. PAE had a tendency to reduce  
17 offspring preference for a HFD, resulting in reduced calorie consumption ( $P = 0.04 -$   
18  $0.06$ ). These data suggest that a relatively low-level, acute PAE can still program  
19 metabolic dysfunction in offspring in a sex-specific manner. These results highlight that  
20 alcohol consumption during pregnancy has the potential to affect the long-term health  
21 of offspring.

22 **Key words:** fetal programming, glucose metabolism, insulin resistance, food preference,  
23 gene expression

24

25

## 26 **Introduction**

27 It is clear from both epidemiological and animal studies that early life events can impact  
28 on development and program adult disease. This is known as the developmental origins  
29 of health and disease (DOHaD) hypothesis and incorporates perturbations throughout  
30 both fetal and early postnatal development (Barker, 2007). During pregnancy, a sub-  
31 optimal uterine environment can result from maternal insults such as malnutrition,  
32 stress, obesity, and drug use. In response to a perturbation, adaptations occur in favour  
33 of vital organs, such as the brain, to ensure short-term fetal survival; however, the  
34 development of other organs deemed relatively unnecessary, such as the kidneys, liver  
35 and pancreas, can be compromised (Heindel & Vandenberg, 2015). This can result in  
36 long-term adverse health outcomes in offspring associated with the altered function in  
37 these organs. Although both clinical studies and animal models suggest that the timing  
38 of exposure can be important, organs requiring a prolonged period of development, such  
39 as the liver (Godlewski *et al.*, 1997) and pancreas (Gittes, 2009), are particularly  
40 vulnerable to insults at multiple time-points. Therefore, metabolic dysfunction is  
41 commonly reported in offspring from animal models of maternal malnutrition, obesity  
42 and stress, as well as clinical studies with evidence of these exposures (see (Fleming *et*  
43 *al.*, 2018) for review). Interestingly, effects are often sex-specific, with males  
44 consistently more susceptible to adverse outcomes than females (Weinberg *et al.*, 2008;  
45 Sundrani *et al.*, 2017).

46 One maternal perturbation receiving increasing attention is prenatal alcohol exposure  
47 (PAE). Despite health authorities advising against alcohol consumption while pregnant  
48 or planning a pregnancy (World Health Organisation, 2004; National Health and  
49 Medical Research Council, 2009), a recent systematic review and meta-analysis  
50 estimated the global rate of alcohol consumption during pregnancy to be ~10%,  
51 although in many Western countries it is much higher (Popova *et al.*, 2017). Although  
52 PAE causes well-recognised neurological and behavioural/cognitive deficits in  
53 offspring, there is also emerging evidence for a range of deficits in other body systems,  
54 leading to long-term adverse health outcomes, including impaired glucose metabolism.  
55 While clinical studies are sparse, one study reports on a small cohort ( $n = 7$ ) of early  
56 school-age children with fetal alcohol syndrome (FAS), providing some evidence of  
57 glucose intolerance and insulin resistance in these patients compared to ‘normal’

58 controls (Castells *et al.*, 1981). However, compelling evidence for metabolic  
59 dysfunction following PAE comes from preclinical studies. In our recent systematic  
60 review, of the 18 studies included all but three reported glucose intolerance and/or  
61 insulin resistance in PAE offspring in adulthood (see (Akison *et al.*, 2019) for details).  
62 This was often associated with disruptions in molecular pathways involved in  
63 gluconeogenesis, glucose transport, IGF signalling and/or insulin signalling pathways in  
64 the liver and/or peripheral tissues. However, previous models tended to administer  
65 chronic, high doses of alcohol, resulting in daily peak blood alcohol concentrations  
66 (BAC) of 100-150 mg/dl (0.10-0.15%) (Chen & Nyomba, 2003b). This is not  
67 representative of drinking patterns reported in the majority of pregnant women (Muggli  
68 *et al.*, 2016; McCormack *et al.*, 2017). Further, recent studies, in both animal models of  
69 PAE (Amos-Kroohs *et al.*, 2018; Dorey *et al.*, 2018) and children with FASD (Werts *et al.*,  
70 *et al.*, 2014; Smith *et al.*, 2015; Amos-Kroohs *et al.*, 2016), also report dysregulated eating  
71 behaviours and food preference, potentially contributing to a propensity towards  
72 diabetes and associated comorbidities such as obesity.

73 In the current study, we used a rat model of moderate, acute alcohol exposure during an  
74 important stage for liver and pancreas development, but within the first trimester  
75 equivalent period in humans, when the mother may still be unaware of her pregnancy.  
76 Timing of exposure was based on the relative development of these organs between  
77 humans and rodents (Godlewski *et al.*, 1997; Pan & Brissova, 2014). Food preference  
78 for a HFD compared to standard chow was examined at 4-5 months of age and then a  
79 glucose tolerance test (GTT) and insulin tolerance test (ITT) were performed in  
80 offspring at 5-6 months of age. In order to elucidate potential molecular mechanisms  
81 contributing to disease phenotypes, the effect of prenatal alcohol exposure on hepatic  
82 expression of genes involved in glucose homeostasis and AKT-signalling in peripheral  
83 tissues were also examined in adult offspring. We hypothesised that our moderate, acute  
84 prenatal alcohol exposure could program glucose intolerance and insulin resistance in  
85 adult offspring, as well as a preference for a high-fat diet. Given previous reports of sex-  
86 specific effects, we separated all analyses by sex.

87

## 88 **Materials and Methods**

### 89 ***Ethical approval***

90 All animal experiments and procedures were approved by The University of  
91 Queensland Anatomical Biosciences Ethics Committee (SBMS/AIBN/521/15/NHMRC)  
92 and were conducted in accordance with the Australian Code for the Care and Use of  
93 Animals for Scientific Purposes (2013, 8th Edition).

94

95 ***Animal model of acute prenatal alcohol exposure***

96 Outbred, nulliparous Sprague-Dawley rats were obtained from the Animal Resources  
97 Centre, Perth WA. All animals were housed at the Australian Institute for  
98 Bioengineering and Nanotechnology (AIBN) Animal Facility (University of  
99 Queensland, St Lucia, QLD, Australia) in a temperature- and humidity-controlled  
100 environment with an artificial 12 h reversed light-dark cycle and provided with standard  
101 laboratory rat chow (Rat & Mouse Meat-Free Diet, Specialty Feeds, Glen Forrest WA,  
102 Australia) and water ad libitum. Following transport, females were group-housed during  
103 an initial acclimation period in open-top cages with wire lids, plastic bases and wood-  
104 chip bedding.

105 At a weight threshold of 230 g (~3-4 months old), dams were assessed daily for  
106 proestrous via vaginal electrical impedance ( $\geq 4.0$  k $\Omega$ ) using an EC40 estrous cycle  
107 monitor (Fine Science Tools, Foster City, CA, USA) as previously described (Jaramillo  
108 *et al.*, 2012). Once in proestrous, dams were mated with a proven stud male for the first  
109 5 h of the dark cycle and successful mating confirmed by the presence of a seminal  
110 plug, with the following morning designated as embryonic day (E) 0.5. Pregnant dams  
111 were housed singly. Dams were weight-matched and then randomly assigned to either  
112 receive ethanol (EtOH) or saline (Control) via oral gavage at E13.5 and E14.5. EtOH  
113 treated females ( $n = 10$ ) received 18% v/v EtOH in saline solution (0.9% NaCl) at a  
114 dose of 1 g/kg body weight, while Control females ( $n = 8$ ) received an equivalent  
115 volume of saline. Gavage was performed between 09:00-10:00 each day. Water and  
116 chow consumption were measured daily from E12.5 (one day prior to first gavage) until  
117 birth. Weight gain was monitored throughout pregnancy. Day of birth was designated  
118 postnatal day (PN) 0, with offspring weighed on alternate days from PN1, then weekly  
119 following weaning at PN21. Once offspring were weaned, all dams were culled via CO<sub>2</sub>  
120 asphyxiation.

121

122 ***Blood and tissue collection***

123 Approximately 150  $\mu$ l whole blood was collected from dams via a tail tip bleed at 1 h  
124 and 5 h post gavage on E13.5 and 14.5 to measure blood alcohol concentration (BAC;  
125 see details for measurement below) and non-fasted blood glucose level using an Accu-  
126 Chek Performa glucometer (Roche, Bella Vista, NSW, Australia). At PN30, a subset of  
127 offspring (1-4 animals per sex from 3-8 litters per treatment; see Supplemental Data 1  
128 for details <https://doi.org/10.5281/zenodo.3257092>) were weighed and then culled via  
129 CO<sub>2</sub> asphyxiation following a 16 h fasting period. Blood was collected via cardiac  
130 puncture for measurement of fasting plasma insulin, metabolites involved in lipid  
131 metabolism and fasting blood glucose. Blood was immediately centrifuged at 4000 rpm  
132 for 10 min at 4°C and plasma separated, aliquoted and stored at -20°C until subsequent  
133 analysis. Fasting blood glucose was also measured in all offspring at 10-11 weeks of  
134 age via a spot tail bleed and glucometer. Litter-mate blood glucose levels were averaged  
135 for each sex prior to analysis for differences between PAE and control. At 6 months of  
136 age, 1 male and 1 female per litter had blood collected as part of a glucose tolerance test  
137 (GTT) or insulin tolerance test (ITT) (see below for details). All offspring were culled at  
138 6-7 months of age via CO<sub>2</sub> asphyxiation, with a subset used for tissue collection (1-2  
139 males and 1-2 females per litter for a total of 12 per sex per treatment). Females were  
140 assessed for proestrous ( $\geq 4.0$  k $\Omega$  vaginal impedance) as described above and were not  
141 culled at this stage of the cycle to reduce potential variability due to hormonal changes  
142 just prior to ovulation. Body weight, abdominal circumference, snout-rump length and  
143 tibia length were measured for calculations of size and ponderal index (weight in  
144 g/cubed length in cm). Pancreas and liver were removed, weighed and a section from  
145 the largest lobe of the liver snap-frozen in liquid N<sub>2</sub> and stored at -80°C for subsequent  
146 molecular analysis. Samples of abdominal visceral fat and the left gastrocnemius  
147 muscle were also frozen for subsequent molecular analysis.

148

149 ***Measurement of blood alcohol concentration (BAC)***

150 Maternal blood samples were immediately centrifuged after collection at 4000 rpm for  
151 10 min at 4°C and plasma separated, aliquoted and stored at -20°C until analysed. Blood  
152 alcohol concentration (BAC) was measured by Pathology Queensland (Queensland

153 Health) using an alcohol dehydrogenase enzymatic assay (Beckman Coulter, Ref  
154 #474947) and a Beckman Coulter AU480 Chemistry Analyzer (Beckman Coulter, Lane  
155 Cove, NSW, Australia). The limit of detection for this assay was 5 mg/dL or 0.005%.

156

### 157 ***Food preference study***

158 Food preference was assessed in offspring 4-5 months of age as previously reported  
159 (Dorey *et al.*, 2018). Briefly, 1 male and 1 female from each litter were randomly  
160 chosen and housed individually in cages with a divided feed hopper. After a 4-day  
161 acclimatisation period, baseline consumption was established by measuring intake of  
162 standard chow diet (SD, 4.8% fat) daily for a period of 4 days and calculating  
163 consumption per gram of body weight. Offspring were then allowed free access to both  
164 a high-fat 'Western' style chow diet (HFD; 21% fat; Specialty Feeds Diet SF00-219)  
165 and the SD over a 4-day test period. The diets were randomly placed on either side of  
166 the feed hopper and their positions switched after 2 days. Cage positions were also  
167 randomised on the racks and were changed after 2 days to prevent systematic sampling  
168 bias of Control and EtOH animals. Food and water intake were recorded daily and  
169 consumption per gram of body weight calculated over the first 2 days (Choice Period 1,  
170 CP1) and the second 2 days (Choice Period 2, CP2) of the two diets being offered. The  
171 test period was split into CP1 and CP2, as a previous study has shown that the novelty  
172 of the HFD diminishes over the test period, resulting in different eating behaviour over  
173 the 4-day period (Dorey *et al.*, 2018).

174

### 175 ***Glucose and insulin tolerance tests***

176 At 6-7 months of age, a GTT and ITT were performed as previously described (Probyn  
177 *et al.*, 2013; Gardebjer *et al.*, 2015). Briefly, 1 male and 1 female were randomly  
178 selected from each litter (EtOH = 9; Control = 8) for each test. For the GTT, offspring  
179 were fasted overnight for 12-16 h and then received an intraperitoneal (ip) injection of a  
180 50% w/v glucose solution (Baxter Healthcare, Old Toongabbie, NSW, Australia) at a  
181 dose of 1 g/kg body weight. Blood was sampled via tail tip bleed, and blood glucose  
182 concentrations were measured using a glucometer prior to glucose administration (-5  
183 min), and at 5, 10, 20, 30, 45, 60 and 90 min post-bolus. Blood was also collected,  
184 processed as described above and plasma stored for subsequent analysis of plasma



185 insulin and glucose levels. For the ITT, non-fasted rats received an ip injection of 0.75  
186 U/kg body weight insulin (Actrapid, Novo Nordisk Pharmaceuticals Pty. Ltd.,  
187 Baulkham Hills, NSW, Australia), and tail tip bleeds were performed to measure blood  
188 glucose concentrations via glucometer as above at -5, 20, 40, 60, 90 and 120 min post-  
189 injection.

190

### 191 ***Quantitative PCR and Western blotting***

192 Expression of genes involved in hepatic glucose metabolism and peripheral tissue  
193 glucose transport and insulin signalling were examined using real-time quantitative  
194 polymerase chain reaction (qPCR) (see Table 1 for details of specific genes). Liver and  
195 gastrocnemius muscle samples collected from 6 month-old offspring ( $n = 8-9$  per sex  
196 per group) were homogenised and total RNA was extracted using RNeasy Mini Kits  
197 (liver; Qiagen, Chadstone, VIC, Australia) or Trizol reagent (muscle; ThermoFisher  
198 Scientific, Richlands, QLD, Australia) according to the manufacturer's instructions.  
199 Total RNA (1  $\mu$ g/reaction for liver; 500 ng/reaction for muscle) was reverse transcribed  
200 into cDNA using iScript Reverse Transcription Supermix for RT-qPCR (Bio-Rad,  
201 Gladesville, NSW, Australia). qPCR reactions were performed on the Applied  
202 Biosystems Quantstudio 6 Flex Real-Time PCR System (ThermoFisher Scientific)  
203 using 10 ng and 20 ng of cDNA for muscle and liver respectively, Quantinova Probe  
204 PCR Master Mix (Qiagen) and Assay-on-Demand primer/probe sets (see Table 1 for  
205 details). Reactions were multiplexed with beta-actin (*Actb*) as an endogenous control. In  
206 addition, *Eif2a* and *Rpl19* were used as additional endogenous control genes for liver  
207 and muscle samples respectively (see Table 1). All control genes were stably expressed  
208 across all samples, irrespective of experimental group or sex (data not shown). The  
209 geometric mean of the two endogenous control genes was used in the  $\Delta\Delta$ Ct calculation  
210 of gene expression, with fold-change expressed relative to the average of the male  
211 offspring saline control group.

212 Total protein was extracted from visceral adipose tissue (100 mg) and gastrocnemius  
213 muscle (30 mg) samples (male offspring only;  $n = 8-9$  per group) for western blot  
214 analysis of total and phosphorylated AKT, which plays a central role in insulin  
215 signalling in peripheral tissues (Mackenzie & Elliott, 2014). Tissues were homogenised  
216 in Cell Lysis Buffer (Cell Signaling Technology, Danvers, MA, USA) with protease

217 (Sigma-Aldrich, Sydney, NSW, Australia) and phosphatase (Roche) inhibitors using a  
218 FastPrep-24 5G homogeniser (MP Biomedicals, Seven Hills, NSW, Australia).  
219 Homogenates were centrifuged (11,000 rpm, 10 min, 4°C) and resultant supernatant  
220 assayed using a DC Protein Assay Kit (Bio-Rad). Samples were loaded onto 12% SDS-  
221 PAGE gels and subsequently transferred overnight at 4°C to Immun-Blot LF PVDF  
222 membranes (Bio-Rad). Membranes were incubated overnight with one of the following  
223 rabbit primary antibodies (all from Cell Signaling Technology): anti-Pan-AKT (1:1000,  
224 Cat# 5373s, 60 kDa, RRID:AB\_10891424), anti-phospho-AKT<sub>Thr308</sub> (1:1000, Cat#  
225 9275s, 60 kDa, RRID:AB\_329828), anti-phospho-AKT<sub>Ser473</sub> (1:1000, Cat# 4060s, 60  
226 kDa, RRID:AB\_2315049). Protein expression was measured as previously described  
227 using a LI-COR Odyssey CLx infrared imaging system (LI-COR Biosciences, Lincoln,  
228 NE, USA, RRID:SCR\_014579) following exposure to LI-COR IRDye 680 goat anti-  
229 rabbit secondary antibody (LI-COR Biosciences, Cat# 926-32221, RRID:AB\_621841).  
230 Band intensity was analysed using Image Studio Lite software (LI-COR Biosciences,  
231 v5.2, RRID:SCR\_013715) and was normalised to glyceraldehyde 3-phosphate  
232 dehydrogenase (GAPDH, 1:1000, Cat# 2118s, 37 kDa, RRID:AB\_561053)  
233 immunoreactivity for densitometric analysis. Protein levels in the EtOH samples were  
234 expressed relative to the average of the saline controls.

235

### 236 ***Plasma insulin, glucose and lipid analysis***

237 Fasting plasma samples collected from offspring at PN30 and during the GTT at 6-7  
238 months of age were analysed for insulin levels using a rat insulin radioimmunoassay kit  
239 (SRI-13K, Millipore Australia, Kilsyth, VIC). Insulin samples were run in duplicate at  
240 1:5, 1:10 or 1:20 dilution. Assay sensitivity was 0.03 ng/mL and inter- and intra-assay  
241 coefficients of variation were 16.7% and 12.1% respectively. Plasma collected at  
242 offspring culls at PN30 were analysed for triglycerides (TG), high-density lipoproteins  
243 (HDL), and low-density lipoproteins (LDL) using a Cobas Integra 400 Plus Chemistry  
244 Analyzer (Block Scientific, Bellport, NY, USA). In addition, plasma collected at  
245 baseline for the GTT at 6 months of age were analysed for glucose levels using the  
246 Cobas Analyzer, for comparison to measurement of glucose levels by the glucometer.  
247 Blood glucose levels, as measured using the glucometer, were found to underestimate  
248 plasma glucose levels measured using the 'gold standard' Cobas analyser (Figure 1A).

249 However, this underestimation was consistent across all treatment/sex combinations  
250 (Figure 1B). Therefore, where insufficient plasma was available for Cobas analysis  
251 (PN30), glucometer readings of blood glucose levels were adequate to compare fasting  
252 glucose and insulin sensitivity/resistance indices between treatment/sex groups. When  
253 sufficient plasma could be collected (6 months of age), plasma glucose levels were used  
254 for all analyses.

255

### 256 ***Calculations and statistical analyses***

257 Area under the glucose (AUGC) and insulin (AUCI) curves were calculated using the  
258 trapezium method with baseline defined as zero (Allison *et al.*, 1995). Glucose  
259 concentration curves for the ITT were inverted before calculating AUGC as previously  
260 described (Gardebjer *et al.*, 2015). Acute 1<sup>st</sup> phase insulin secretion was calculated as  
261 the AUCI from basal to 5 min post-glucose bolus and 2<sup>nd</sup> phase insulin secretion as the  
262 AUCI from 5 to 120 min post-bolus. Quantitative insulin sensitivity check index  
263 (QUICKI) was calculated using  $1/[\log(\text{fasting insulin } (\mu\text{U/mL})) + \log(\text{fasting glucose}$   
264  $(\text{mg/dL})]$  (Katz *et al.*, 2000). The homeostasis model assessment-estimated insulin  
265 resistance (HOMA-IR) was calculated using  $[\text{fasting insulin } (\mu\text{U/mL}) \times \text{fasting glucose}$   
266  $(\text{mg/dL})]/2430$ , which has been validated for use in rats (Cacho *et al.*, 2008). Total  
267 cholesterol (TC) was calculated by re-arranging the Friedewald equation (Friedewald *et*  
268 *al.*, 1972) such that  $\text{TC} = \text{HDL} + \text{LDL} + (\text{TG}/5)$ .

269 All raw data and sample sizes for figures and tables are provided in Supplemental Data  
270 1 (<https://doi.org/10.5281/zenodo.3257092>). Analyses were conducted using GraphPad  
271 Prism 7.0 (GraphPad Software, San Diego, CA, USA) and all data presented as mean  $\pm$   
272 SEM. Prior to analysis, all data were tested for normality using the D'Agostino-  
273 Pearson omnibus or the Shapiro-Wilk normality tests. Maternal parameters and western  
274 blot data were analysed using a Student's t-test (parametric data) or a Mann-Whitney U-  
275 test (non-parametric data). Where variances were significantly different but data was  
276 normally distributed, Welch's correction was applied. All other data were analysed  
277 using a two-way ANOVA, with offspring sex (male/female) and treatment group  
278 (EtOH/Control) as factors. Where there was a significant interaction, a Sidak multiple  
279 comparison test was used to determine significantly different groups. Where data was  
280 not normally distributed, a non-parametric Kruskal-Wallis test across all treatment/sex

281 groups was used, with Dunn's multiple comparison test used to determine significantly  
282 different groups. Significance level was  $P < 0.05$  for all statistical tests.

283

## 284 **Results**

### 285 ***Maternal parameters and postnatal growth***

286 Dams in the EtOH and Control groups were of similar weight at mating and at E13.5  
287 (Table 2). Gestational weight gain prior to gavage and post-gavage were also not  
288 significantly different between groups, nor were daily chow or water consumption  
289 (Table 2). Blood glucose concentrations at 1 h and 5 h post gavage on E13.5 and E14.5  
290 were not significantly different (Table 2). There were also no differences in pregnancy  
291 outcomes between EtOH and Control dams, such as litter sex ratio, litter size, and  
292 number of implantation scars (Table 2). However, one dam in the EtOH group had a  
293 litter of only 7 pups due to a suspected blockage in one uterine horn (no implantation  
294 scars were observed) and so this litter was excluded from subsequent analyses. BAC  
295 was measured in 4 out of 8 Control dams, with BAC below the limit of detection at each  
296 time point. In EtOH-treated dams, mean BAC was ~50 mg/dL (~0.05%) at 1 h  
297 following gavage at E13.5 and E14.5, but by 5 h post-gavage, was below the limit of  
298 detection on both days (Table 2).

299 There was no difference in pup weights at PN1 between EtOH and control litters, nor  
300 differences in weight gain until weaning at PN21 (Table 3). For the first week post-  
301 weaning, weight gain was higher in males than in females ( $P_{(sex)} = 0.03$ ) but there was  
302 no effect of treatment (Table 3). Weights of offspring at the PN30 cull were also not  
303 different (Table 3).

304

### 305 ***Fasting blood glucose, plasma insulin and lipid levels in adolescent offspring***

306 Fasting blood glucose, plasma insulin and indexes for insulin resistance (HOMA-IR)  
307 and insulin sensitivity (QUICKI) were not significantly different between groups in  
308 either sex at PN30 (Table 4). Fasting blood glucose (mmol/L) was also not different at  
309 10-11 weeks of age (Male EtOH:  $5.5 \pm 0.2$ ,  $n = 9$ ; Male Control:  $5.5 \pm 0.2$ ,  $n = 8$ ;  
310 Female EtOH:  $5.3 \pm 0.1$ ,  $n = 9$ ; Female Control:  $5.5 \pm 0.1$ ,  $n = 8$ .  $P_{\text{treat}} = 0.69$ ,  $P_{\text{sex}} =$

311 0.51,  $P_{\text{int}} = 0.57$ ). The plasma lipid profile (HDL, LDL, TG and TC) was also not  
312 different between EtOH and control offspring at PN30 (Table 4).

313

#### 314 ***Food preference and water consumption at 4-5 months of age***

315 There were no significant differences in consumption of SD or HFD between EtOH and  
316 Control offspring at any time (Table 5). Animals consumed ~10-fold more HFD than  
317 SD during CP1, with a concomitant 10-fold decrease in SD consumption compared to  
318 baseline levels. This continued through CP2, although HFD consumption dropped to  
319 ~4-fold that of SD. However, there were sex differences in consumption rates, with  
320 females consuming more SD at baseline and more HFD during CP1 and CP2 than males  
321 (Table 5). However, as the HFD was more energy dense than the SD (19.4 MJ/kg  
322 versus 14.0 MJ/kg), there was a significant decrease in energy intake per day by the  
323 EtOH groups compared to controls, due to a slightly reduced (non-significant)  
324 consumption of HFD by these groups.

325 Daily baseline water and SD consumption was not significantly different between  
326 Control and EtOH offspring in either sex, but females did drink a larger volume of  
327 water compared to males, regardless of treatment (Table 5). EtOH females also showed  
328 a tendency to increase their water consumption compared to controls in the 2<sup>nd</sup> half of  
329 the testing period (CP2, Table 5) with a non-parametric Mann-Whitney U-test  
330 performed separately for each sex, indicating a significant difference between control  
331 and EtOH females ( $P = 0.003$ ) but no difference between groups within males ( $P =$   
332 0.34).

333

#### 334 ***Fasting plasma glucose, glucose clearance and insulin sensitivity in adult offspring***

335 At 6 months of age, fasting plasma glucose continued to be similar between EtOH and  
336 Control groups and between males and females (Figure 2A). However, fasting plasma  
337 insulin was significantly elevated in males only (Figure 2B). HOMA-IR and QUICKI  
338 indices were also significantly altered in EtOH compared to Control offspring,  
339 indicative of increased insulin resistance and reduced insulin sensitivity (Figure 2C, D).  
340 In the GTT, there was no significant difference in the overall AUGC between EtOH and  
341 Control offspring (Figure 3B). However, there was a tendency for the EtOH females to

342 exhibit a reduced response to glucose injection, resulting in a trend ( $P = 0.07$ ) for  
343 reduced AUGC in females versus males (Figure 3A, B). Insulin output, as shown by the  
344 AUC, was significantly elevated in males compared to females during the GTT (Figure  
345 3C, D). This was particularly evident during the acute first-phase insulin response, with  
346 EtOH males having a tendency to increase insulin output compared to Control males  
347 and female offspring (Figure 3E). Second phase insulin production continued to be  
348 higher in males than females, but there was no effect of PAE (Figure 3F). In addition,  
349 EtOH male offspring had significantly reduced glucose clearance in response to  
350 exogenous insulin in the ITT (Figure 3G, H). However, PAE had no effect on glucose  
351 clearance in females during the ITT (Figure 3H).

352

### 353 ***Body condition and organ weights at 6 months of age***

354 At the completion of the study, all animals were culled and a subset (1-2 males and/or  
355 females per litter for  $n=12$  per sex per group) underwent detailed morphometric  
356 analysis. There was no significant difference in body weight, measures of size (snout-  
357 rump length, tibia length), or measures of body condition (ponderal index, absolute  
358 abdominal circumference and abdominal circumference relative to body size  
359 parameters) between EtOH-exposed and control offspring (Table 6). However, as would  
360 be expected, males were significantly larger than females across all parameters (Table  
361 6). There was also no significant difference in liver or pancreas weight (absolute or  
362 relative to body weight) between EtOH and control offspring. Again, liver weight  
363 (absolute and relative to BW) and absolute pancreas weight were significantly larger in  
364 males than females. However, pancreas weight relative to body weight was significantly  
365 larger in females than males (Table 6).

366

### 367 ***Expression of hepatic genes involved in insulin signalling and glucose homeostasis***

368 Liver tissue was collected from 6 month-old offspring for analysis of genes involved in  
369 glucose transport (*Glut2*), homeostatic regulation of glucose levels (*G6pc*, *Gck*, *Pck1*  
370 and *Ppargc1a*) and insulin signalling (*Insr*) (Table 7). There was no significant  
371 difference in the expression of these genes between EtOH-exposed and control  
372 offspring (Table 7). However, there was a sex-specific difference in expression of



373 *Ppargc1a* and *Insr*, and a trend for an effect of sex on *Glut2* expression, with all three  
374 genes displaying higher relative expression in females compared with males (Table 7).

375

### 376 ***Peripheral tissue insulin signalling***

377 Given the insulin resistance observed in EtOH-exposed males, we examined a key  
378 molecule involved in the insulin signalling pathway in peripheral tissues, AKT, also  
379 known as protein kinase B. In skeletal muscle, there was no significant difference in  
380 total (pan-)AKT, pAKT<sub>Ser473</sub> (absolute or as a ratio of pan-AKT) or pAKT<sub>Thr308</sub>  
381 (absolute or as a ratio of pan-AKT) between EtOH-exposed and control male offspring  
382 (Figure 4A-E). Muscle gene expression of the glucose transporter, *Glut4*, and the insulin  
383 receptor, *Insr*, were also not affected by EtOH exposure (Figure 4F, G). However, there  
384 was a significant increase in pan-AKT in adipose tissue from EtOH-exposed males  
385 compared to controls (Figure 5A) and a tendency for increased pAKT<sub>Ser473</sub> (Figure 5B,  
386  $P = 0.13$ ) and pAKT<sub>Thr308</sub> (Figure 5C,  $P = 0.07$ ), and but not as a ratio of pan-AKT  
387 (Figure 5D, E).

388

### 389 **Discussion**

390 This study demonstrates for the first time that a low, acute dose of prenatal EtOH can  
391 program metabolic dysfunction in a sex-specific manner. Male offspring developed  
392 insulin resistance at 6 months of age, regardless of the lack of traditional hallmarks of  
393 low birth weight and catch-up growth seen in fetal programming. PAE male offspring  
394 also showed alterations in insulin signalling in adipose tissue. Given that BAC levels  
395 following alcohol exposure were relatively moderate, at ~0.05%, these results  
396 strengthen the message that no amount of alcohol during pregnancy is safe for long-  
397 term offspring health.

398 Previous preclinical studies investigating the association between PAE and offspring  
399 metabolic health have typically used a high dose (2 g/kg BW administered twice a day)  
400 throughout gestation and found this can induce glucose intolerance and insulin  
401 resistance (see (Akison *et al.*, 2019) for review). This dosage typically results in a peak  
402 BAC of ~0.1-0.15% (Chen & Nyomba, 2003b). However, our moderate, acute dose  
403 model, resulting in a BAC of just 0.05% one hour after gavage, is more representative

404 of drinking practices in pregnant women who report drinking on average 1-2 standard  
405 drinks sporadically during pregnancy. Although the model used in this study has been  
406 previously used by Gray et al. (Gray *et al.*, 2010), they reported a BAC of 0.107% in  
407 treated dams 1 h after gavage. The reasons for these differences in BAC are unknown  
408 but given these discrepancies, this highlights the importance of measuring and reporting  
409 BAC levels, in addition to providing the dosage administered.

410 In our moderate exposure model, there were no changes in fasting blood glucose levels  
411 at any age, or fasting insulin levels in adolescent offspring exposed to prenatal alcohol.  
412 Blood glucose concentrations during a GTT performed at 6 months of age were also not  
413 altered. However, the major finding of our study was that male offspring exposed to  
414 alcohol showed evidence of insulin resistance at 6 months of age, with elevated fasting  
415 plasma insulin, resulting in an increased HOMA-IR index, indicative of insulin  
416 resistance, and a decreased QUICKI index, indicative of reduced insulin sensitivity.  
417 There was also a trend for increased first phase insulin secretion during the GTT and a  
418 significant impairment in glucose clearance following an insulin challenge. This is  
419 consistent with findings of a recent systematic review, which found that of 12  
420 preclinical studies that examined glucose metabolism using a GTT and/or ITT, all but  
421 one study found evidence of insulin resistance (Akison *et al.*, 2019). However, the  
422 majority of these studies also reported changes in circulating glucose levels following  
423 PAE. Interestingly, only one of these 12 studies had a low BAC (peak of ~0.03%),  
424 comparable to that measured in our study. That study, using a chronic low dose of  
425 alcohol throughout pregnancy, also found increased first phase insulin secretion in  
426 response to a glucose challenge exclusively in males, without concomitant changes in  
427 blood glucose levels (Probyn *et al.*, 2013). These are hallmarks of a pre-diabetic state.  
428 This suggests that the BAC may need to reach a higher threshold to induce changes in  
429 glucose tolerance, while changes in insulin sensitivity can potentially manifest  
430 following exposure to a much lower BAC.

431 We explored potential molecular mechanisms underlying the observed insulin resistant  
432 phenotype. Given the importance of the liver for glucose homeostasis, we examined the  
433 expression of a selection of hepatic genes involved in glucose transport (*Glut2*), glucose  
434 homeostasis (*G6pc*, *Gck*, *Pck1*, *Ppargc1a*) and insulin signalling (*Insr*). Similar to our  
435 low dose chronic alcohol exposure model (Probyn *et al.*, 2013), we found no



436 dysregulation of these genes due to PAE, and instead observed only sex-specific  
437 differences in gene expression. This suggested the deficits lay within peripheral tissues  
438 regulating glucose uptake and utilisation. Supporting this, we did find alterations in  
439 PI3K/AKT signalling in a peripheral tissue, specifically in adipose tissue. AKT  
440 signalling is known to play an essential role in insulin-mediated glucose uptake in these  
441 peripheral tissues (Huang *et al.*, 2018). Both total AKT and activated AKT, measured  
442 by phosphorylation at Threonine 308, were elevated in adipose tissue collected from  
443 PAE male offspring at 6 months of age. However, it is pAKT(Ser473) that is the rate-  
444 limiting factor, suggesting that no compensatory changes to the levels of  
445 phosphorylation at this site may underlie the dysregulated glucose clearing observed  
446 during the ITT. Our results are consistent to a previous study investigating insulin  
447 signalling in offspring exposed to periconceptional alcohol (Gardebjer *et al.*, 2015).  
448 This suggests that increased pAKT(Thr308) may be a potential compensatory  
449 mechanism in response to increased fasting insulin levels. We found no differences in  
450 muscle expression of *Glut4* or AKT signalling that have been demonstrated in other  
451 models of prenatal alcohol (Chen & Nyomba, 2003a; Chen & Nyomba, 2003b; Chen *et*  
452 *al.*, 2005; Yao *et al.*, 2006), highlighting this relatively low amount of alcohol for just  
453 two days may not have reached a sufficient threshold to result in long-term changes in  
454 this tissue.

455 Maternal malnutrition, even if relatively modest, is an established prenatal perturbation  
456 which may result in fetal growth restriction and offspring metabolic disorders (Flynn *et*  
457 *al.*, 2013; Gao *et al.*, 2014). However, this can be excluded in our study, as food and  
458 water consumption throughout pregnancy did not differ between the EtOH and control  
459 dams. Additionally, there were no differences in other maternal parameters known to  
460 affect offspring metabolic outcome, such as obesity (Whitaker, 2004; El-Gilany &  
461 Hammad, 2010; Janjua *et al.*, 2012), gestational weight gain (Margerison Zilko *et al.*,  
462 2010) and blood glucose (used as an indicator for gestational diabetes) (Van Wootten &  
463 Turner, 2002). Previous preclinical studies have reported reduced birth weight and  
464 subsequent ‘catch-up’ growth in offspring exposed to prenatal alcohol that was  
465 associated with subsequent metabolic dysfunction, specifically insulin resistance, in  
466 adults (Chen & Nyomba, 2003b; Yao *et al.*, 2006; Dobson *et al.*, 2014; Xia *et al.*, 2014;  
467 Gardebjer *et al.*, 2015). However, other studies highlight that growth restriction is not

468 required to program chronic disease, with insulin resistance arising in PAE offspring  
469 irrespective of birth weight (Chen & Nyomba, 2004; Yao & Nyomba, 2008; Probyn *et*  
470 *al.*, 2013; Yao *et al.*, 2013). Clinical studies have also reported that growth restriction is  
471 not a prerequisite for development of metabolic syndrome (Euser *et al.*, 2010; Kopec *et*  
472 *al.*, 2017). We found no differences in offspring weight soon after birth, or postnatally,  
473 between control and PAE offspring, and yet males developed insulin resistance at 6  
474 months of age. Interestingly, the low-dose model mentioned above, which showed a  
475 similar insulin resistant phenotype in males only, also exhibited normal birth weights  
476 and offspring growth (Probyn *et al.*, 2013). This highlights that even low-dose  
477 exposures can program offspring disease, irrespective of birth weight.

478 PAE offspring at 4 months of age did not exhibit a preference for a HFD. However,  
479 they did eat slightly less than controls, which resulted in a significantly lower energy  
480 consumption in PAE offspring due to the HFD being more energy rich. This was  
481 particularly evident in the second choice period, when the novelty of the new diet had  
482 presumably waned (Dorey *et al.*, 2018). This was contrary to a recent study in rat  
483 offspring exposed to a higher dose of alcohol exclusively around conception, which  
484 found that males preferentially consumed more HFD than controls (Dorey *et al.*, 2018).  
485 However, this study was conducted in much older rats (15 months of age). Clinical  
486 studies have found that children diagnosed with FASD tend to have hyperphagia and  
487 abnormal eating patterns, including constant snacking and impaired satiety (Werts *et al.*,  
488 2014; Amos-Kroohs *et al.*, 2016). Our results are more consistent with a study  
489 conducted in mice, which found no changes in food preference as a result of PAE  
490 (Amos-Kroohs *et al.*, 2018). Interestingly, that study also restricted PAE to later in  
491 gestation (E12.5-17.5).

492 Our study also revealed a tendency for PAE females to consume more water than  
493 controls. This was consistent with a recent study in 18 month-old rat offspring exposed  
494 to periconceptional alcohol, which found that exposed females consumed significantly  
495 more water than controls (Dorey *et al.*, 2018). Two other studies have also reported  
496 increased water intake in 2-3 month-old rat offspring due to PAE from embryonic day  
497 6/7 to birth (Dow-Edwards *et al.*, 1989; Knee *et al.*, 2004). One only measured this in  
498 male offspring (Dow-Edwards *et al.*, 1989). However, the second study measured this  
499 in both sexes and found the polydipsia phenotype was most pronounced in females

500 (Knee *et al.*, 2004). One other preclinical study found no effect of an acute binge  
501 exposure at embryonic day 7, although they only examined male offspring (Desroches  
502 *et al.*, 1987). This suggests a sex-specific, polydipsia phenotype associated with PAE.  
503 Although we did not examine renal function, a previous study using the same acute  
504 PAE protocol in rats showed sex-specific alterations in glomerular filtration rate and  
505 altered protein excretion at 6 months of age, particularly in males (Gray *et al.*, 2010).  
506 A possible limitation of this study was that the saline gavage did not control for the  
507 additional calories provided by the EtOH. A recent study highlighted that the typical  
508 maltodextrin control, used as a substitute for the calories provided by EtOH, is not  
509 metabolised in the same way, and when a medium chain triglycerides solution was  
510 included as a control, no changes in metabolic outcomes could be attributed to PAE  
511 (Amos-Kroohs *et al.*, 2018).  
512 Furthermore, although the low dose PAE in this study did not affect body weight at 6  
513 months, we did not specifically assess body fat. Studies have previously assessed body  
514 composition in PAE offspring using dual-energy X-ray absorptiometry (DEXA) and/or  
515 magnetic resonance imaging (MRI), with variable results. Our result is similar to that  
516 found in a previous low-dose model in rats (Probyn *et al.*, 2013), as well as a study in  
517 mice with EtOH exposure restricted to late gestation (Amos-Kroohs *et al.*, 2018).  
518 However, three studies reported increased adiposity in PAE offspring compared to  
519 controls, particularly in males (Dobson *et al.*, 2012; Gardebjer *et al.*, 2018; Zhang *et al.*,  
520 2018). Given we saw a reduced tendency for PAE offspring to consume a high fat,  
521 energy dense diet when it was offered, our model does not suggest that PAE offspring  
522 were at increased risk for adiposity later in life.

523

## 524 ***Conclusions***

525 This study supports the programming of offspring metabolic health as a result of a  
526 relatively moderate PAE during a critical period of development. Although ethanol was  
527 administered during mid-pregnancy in the rat, this equates to ~week 10-12 of a human  
528 pregnancy when a woman may not yet be aware she is pregnant, particularly if the  
529 pregnancy was not planned. The pre-diabetic, insulin resistant phenotype reported in  
530 male offspring of PAE dams occurred despite a relatively low BAC and standard  
531 postnatal care, and without the ‘2<sup>nd</sup> Hit’ of a high fat diet as used by others to ‘unmask’

532 disease. Programmed alterations were also independent of maternal parameters known  
533 to affect offspring metabolic health, such as gestational diabetes and obesity. Therefore,  
534 this study highlights the importance of abstaining from alcohol consumption during  
535 pregnancy or when planning a pregnancy.

536

### 537 **Additional information**

#### 538 ***Competing interests***

539 The authors have no conflicts of interest to disclose.

540

#### 541 ***Author contributions***

542 All experiments were performed in the Developmental Programming in Disease Lab,  
543 School of Biomedical Sciences, The University of Queensland. K.M.M. and L.K.A.  
544 were responsible for the conception and design of the experiments. T.M.T.N., L.K.A.  
545 and S.E.S. were responsible for the collection of the data. All authors were involved in  
546 data analysis and/or interpretation. All authors contributed to drafting the work and/or  
547 revising it critically for important intellectual content. All authors approve of the final  
548 version of the manuscript and agree to be accountable for all aspects of the work in  
549 ensuring that questions related to the accuracy or integrity of any part of the work are  
550 appropriately investigated and resolved. All persons designated as authors qualify for  
551 authorship, and all those who qualify for authorship are listed.

552

#### 553 ***Funding***

554 Funding for this project was provided by the University of Queensland Early Career  
555 Researcher Grants Scheme (to L.K.A.) and the National Health and Medical Research  
556 Council (to K.M.M., APP1078164).

557

#### 558 **Acknowledgements**

559 We would like to acknowledge Natasha Steiger (Animal Endocrinology Lab, School of  
560 Biomedical Sciences, University of Queensland) for analysis of plasma insulin; Dave  
561 Herne and Barb Arnts (University of Queensland Biological Resources) for assistance  
562 with animal treatments and husbandry; Elizabeth McReight (School of Biomedical

563 Sciences, University of Queensland) for assistance with animal work; and Jacobus  
564 Ungerer (Pathology Queensland, Queensland Health) for analysis of BAC.

565

### 566 **Supporting information**

567 Supplemental Data 1 contains all underlying data used in figures and tables reported in  
568 this study and can be accessed from the following URL:

569 <https://doi.org/10.5281/zenodo.3257092>.

570

### 571 **References**

572 Akison LK, Reid N, Wyllie M & Moritz KM. (2019). Adverse health outcomes in  
573 offspring associated with fetal alcohol exposure: A systematic review of clinical  
574 and preclinical studies with a focus on metabolic and body composition  
575 outcomes. *Alcohol Clin Exp Res*, DOI: 10.1111/acer.14078.

576

577 Allison DB, Paultre F, Maggio C, Mezzitis N & Pi-Sunyer FX. (1995). The use of areas  
578 under curves in diabetes research. *Diabetes Care* **18**, 245-250.

579

580 Amos-Kroohs RM, Fink BA, Smith CJ, Chin L, Van Calcar SC, Wozniak JR & Smith  
581 SM. (2016). Abnormal eating behaviors are common in children with fetal  
582 alcohol spectrum disorder. *J Pediatr* **169**, 194-200 e191.

583

584 Amos-Kroohs RM, Nelson DW, Hacker TA, Yen C-LE & Smith SM. (2018). Does  
585 prenatal alcohol exposure cause a metabolic syndrome?(Non-) evidence from a  
586 mouse model of fetal alcohol spectrum disorder. *PloS one* **13**, e0199213.

587

588 Barker DJ. (2007). The origins of the developmental origins theory. *J Intern Med* **261**,  
589 412-417.

590

591 Cacho J, Sevillano J, de Castro J, Herrera E & Ramos MP. (2008). Validation of simple  
592 indexes to assess insulin sensitivity during pregnancy in Wistar and Sprague-  
593 Dawley rats. *American journal of physiology Endocrinology and metabolism*  
594 **295**, E1269-1276.

595

596 Castells S, Mark E, Abaci F & Schwartz E. (1981). Growth retardation in fetal alcohol  
597 syndrome. Unresponsiveness to growth-promoting hormones. *Dev Pharmacol*  
598 *Ther* **3**, 232-241.

599

600 Chen L & Nyomba B. (2003a). Glucose intolerance and resistin expression in rat  
601 offspring exposed to ethanol in utero: modulation by postnatal high-fat diet.  
602 *Endocrinology* **144**, 500-508.

603

604 Chen L & Nyomba BLG. (2003b). Effects of prenatal alcohol exposure on glucose  
605 tolerance in the rat offspring. *Metab Clin Exp* **52**, 454-462.

606

607 Chen L & Nyomba BLG. (2004). Whole body insulin resistance in rat offspring of  
608 mothers consuming alcohol during pregnancy or lactation: comparing prenatal  
609 and postnatal exposure. *J Appl Physiol* **96**, 167-172.

610

611 Chen L, Yao XH & Nyomba BL. (2005). In vivo insulin signaling through PI3-kinase is  
612 impaired in skeletal muscle of adult rat offspring exposed to ethanol in utero. *J*  
613 *Appl Physiol* **99**, 528-534.

614

615 Desroches D, Ryan K, Vleck E & Benno RH. (1987). Effects of acute, in utero, alcohol  
616 exposure on growth and electrolyte metabolism in male offspring of C57BL/10J  
617 mice. *Alcohol and drug research* **7**, 415-422.

618

619 Dobson CC, Mongillo DL, Brien DC, Stepita R, Poklewska-Koziell M, Winterborn A,  
620 Holloway AC, Brien JF & Reynolds JN. (2012). Chronic prenatal ethanol  
621 exposure increases adiposity and disrupts pancreatic morphology in adult guinea  
622 pig offspring. *Nutr Diabetes* **2**, e57.

623

624 Dobson CC, Thevasundaram K, Mongillo DL, Winterborn A, Holloway AC, Brien JF  
625 & Reynolds JN. (2014). Chronic prenatal ethanol exposure alters expression of

- 626 central and peripheral insulin signaling molecules in adult guinea pig offspring.  
627 *Alcohol (Fayetteville, NY)* **48**, 687-693.  
628
- 629 Dorey ES, Cullen CL, Lucia D, Mah KM, Manchadi MR, Muhlhausler BS & Moritz  
630 KM. (2018). The impact of periconceptional alcohol exposure on fat preference  
631 and gene expression in the mesolimbic reward pathway in adult rat offspring.  
632 *Journal of developmental origins of health and disease* **9**, 223-231.  
633
- 634 Dow-Edwards DL, Trachtman H, Riley EP, Freed LA & Milhorat TH. (1989). Arginine  
635 vasopressin and body fluid homeostasis in the fetal alcohol exposed rat. *Alcohol*  
636 *(Fayetteville, NY)* **6**, 193-198.  
637
- 638 El-Gilany A-H & Hammad S. (2010). Body mass index and obstetric outcomes in Saudi  
639 Arabia: a prospective cohort study. *Ann Saudi Med* **30**, 376-380.  
640
- 641 Euser AM, Dekker FW & Hallan SI. (2010). Intrauterine growth restriction: no unifying  
642 risk factor for the metabolic syndrome in young adults. *European journal of*  
643 *cardiovascular prevention and rehabilitation : official journal of the European*  
644 *Society of Cardiology, Working Groups on Epidemiology & Prevention and*  
645 *Cardiac Rehabilitation and Exercise Physiology* **17**, 314-320.  
646
- 647 Fleming TP, Watkins AJ, Velazquez MA, Mathers JC, Prentice AM, Stephenson J,  
648 Barker M, Saffery R, Yajnik CS, Eckert JJ, Hanson MA, Forrester T, Gluckman  
649 PD & Godfrey KM. (2018). Origins of lifetime health around the time of  
650 conception: causes and consequences. *Lancet* **391**, 1842-1852.  
651
- 652 Flynn ER, Alexander BT, Lee J, Hutchens ZM, Jr. & Maric-Bilkan C. (2013). High-  
653 fat/fructose feeding during prenatal and postnatal development in female rats  
654 increases susceptibility to renal and metabolic injury later in life. *American*  
655 *journal of physiology Regulatory, integrative and comparative physiology* **304**,  
656 R278-285.  
657



658 Friedewald WT, Levy RI & Fredrickson DS. (1972). Estimation of the concentration of  
659 low-density lipoprotein cholesterol in plasma, without use of the preparative  
660 ultracentrifuge. *Clin Chem* **18**, 499-502.

661

662 Gao F, Liu Y, Li L, Li M, Zhang C, Ao C & Hou X. (2014). Effects of maternal  
663 undernutrition during late pregnancy on the development and function of ovine  
664 fetal liver. *Animal reproduction science* **147**, 99-105.

665

666 Gardebjer EM, Anderson ST, Pantaleon M, Wlodek ME & Moritz KM. (2015).  
667 Maternal alcohol intake around the time of conception causes glucose  
668 intolerance and insulin insensitivity in rat offspring, which is exacerbated by a  
669 postnatal high-fat diet. *FASEBJ* **29**, 2690-2701.

670

671 Gardebjer EM, Cuffe JSM, Ward LC, Steane S, Anderson ST, Dorey ES, Kalisch-Smith  
672 JI, Pantaleon M, Chong S, Yamada L, Wlodek ME, Bielefeldt-Ohmann H &  
673 Moritz KM. (2018). The effects of periconceptional maternal alcohol intake and  
674 a postnatal high-fat diet on obesity and liver disease in male and female rat  
675 offspring. *American journal of physiology Endocrinology and metabolism* **315**,  
676 E694-E704.

677

678 Gittes GK. (2009). Developmental biology of the pancreas: a comprehensive review.  
679 *Dev Biol* **326**, 4-35.

680

681 Godlewski G, Gaubert-Cristol R, Rouy S & Prudhomme M. (1997). Liver development  
682 in the rat and in man during the embryonic period (Carnegie stages 11-23).  
683 *Microscopy research and technique* **39**, 314-327.

684

685 Gray SP, Denton KM, Cullen-McEwen L, Bertram JF & Moritz KM. (2010). Prenatal  
686 exposure to alcohol reduces nephron number and raises blood pressure in  
687 progeny. *Journal of the American Society of Nephrology : JASN* **21**, 1891-1902.

688



- 689 Heindel JJ & Vandenberg NL. (2015). Developmental origins of health and disease: a  
690 paradigm for understanding disease cause and prevention. *Curr Opin Pediatr* **27**,  
691 248-253.
- 692
- 693 Huang X, Liu G, Guo J & Su Z. (2018). The PI3K/AKT pathway in obesity and type 2  
694 diabetes. *International journal of biological sciences* **14**, 1483-1496.
- 695
- 696 Janjua NZ, Mahmood B, Islam MA & Goldenberg RL. (2012). Maternal and early  
697 childhood risk factors for overweight and obesity among low-income  
698 predominantly black children at age five years: A prospective cohort study.  
699 *Journal of obesity* **2012**, 457173.
- 700
- 701 Jaramillo LM, Balcazar IB & Duran C. (2012). Using vaginal wall impedance to  
702 determine estrous cycle phase in Lewis rats. *Lab Animal* **41**, 122.
- 703
- 704 Katz A, Nambi SS, Mather K, Baron AD, Follmann DA, Sullivan G & Quon MJ.  
705 (2000). Quantitative insulin sensitivity check index: a simple, accurate method  
706 for assessing insulin sensitivity in humans. *J Clin Endocrinol Metab* **85**, 2402-  
707 2410.
- 708
- 709 Knee DS, Sato AK, Uyehara CFT & Claybaugh JR. (2004). Prenatal exposure to  
710 ethanol causes partial diabetes insipidus in adult rats. *American journal of*  
711 *physiology Regulatory, integrative and comparative physiology* **287**, R277-  
712 R283.
- 713
- 714 Kopec G, Shekhawat PS & Mhanna MJ. (2017). Prevalence of diabetes and obesity in  
715 association with prematurity and growth restriction. *Diabetes Metab Syndr Obes*  
716 **10**, 285-295.
- 717
- 718 Mackenzie RW & Elliott BT. (2014). Akt/PKB activation and insulin signaling: a novel  
719 insulin signaling pathway in the treatment of type 2 diabetes. *Diabetes Metab*  
720 *Syndr Obes* **7**, 55-64.

721

722 Margerison Zilko CE, Rehkopf D & Abrams B. (2010). Association of maternal  
723 gestational weight gain with short- and long-term maternal and child health  
724 outcomes. *American journal of obstetrics and gynecology* **202**, 574.e571-578.

725

726 McCormack C, Hutchinson D, Burns L, Wilson J, Elliott E, Allsop S, Najman J, Jacobs  
727 S, Rossen L, Olsson C & Mattick R. (2017). Prenatal alcohol consumption  
728 between conception and recognition of pregnancy. *Alcohol Clin Exp Res* **41**,  
729 369-378.

730

731 Muggli E, O’Leary C, Donath S, Orsini F, Forster D, Anderson PJ, Lewis S, Nagle C,  
732 Craig JM, Elliott E & Halliday J. (2016). “Did you ever drink more?” A detailed  
733 description of pregnant women’s drinking patterns. *BMC public health* **16**, 683.

734

735 National Health and Medical Research Council. (2009). Australian Guidelines to  
736 Reduce Health Risks from Drinking Alcohol, pp. 181. Commonwealth of  
737 Australia, Canberra, ACT.

738

739 Pan FC & Brissova M. (2014). Pancreas development in humans. *Current opinion in*  
740 *endocrinology, diabetes, and obesity* **21**, 77-82.

741

742 Popova S, Lange S, Probst C, Gmel G & Rehm J. (2017). Estimation of national,  
743 regional, and global prevalence of alcohol use during pregnancy and fetal  
744 alcohol syndrome: a systematic review and meta-analysis. *The Lancet Global*  
745 *health* **5**, e290-e299.

746

747 Probyn ME, Parsonson KR, Gardebjer EM, Ward LC, Wlodek ME, Anderson ST &  
748 Moritz KM. (2013). Impact of low dose prenatal ethanol exposure on glucose  
749 homeostasis in Sprague-Dawley rats aged up to eight months. *PloS one* **8**,  
750 e59718.

751

- 752 Smith S, Amos-Kroohs R, Chin L, Fink B & Wozniak J. (2015). Disordered eating  
753 behaviors and nutritional issues in children with Fetal Alcohol Spectrum  
754 Disorders (FASD). *FASEBJ* **29**.
- 755
- 756 Sundrani DP, Roy SS, Jadhav AT & Joshi SR. (2017). Sex-specific differences and  
757 developmental programming for diseases in later life. *Reproduction, fertility,  
758 and development* **29**, 2085-2099.
- 759
- 760 Van Wootten W & Turner RE. (2002). Macrosomia in neonates of mothers with  
761 gestational diabetes is associated with body mass index and previous gestational  
762 diabetes. *Journal of the American Dietetic Association* **102**, 241-243.
- 763
- 764 Weinberg J, Sliwowska JH, Lan N & Hellemans KG. (2008). Prenatal alcohol exposure:  
765 foetal programming, the hypothalamic-pituitary-adrenal axis and sex differences  
766 in outcome. *Journal of neuroendocrinology* **20**, 470-488.
- 767
- 768 Werts RL, Van Calcar SC, Wargowski DS & Smith SM. (2014). Inappropriate feeding  
769 behaviors and dietary intakes in children with fetal alcohol spectrum disorder or  
770 probable prenatal alcohol exposure. *Alcohol Clin Exp Res* **38**, 871-878.
- 771
- 772 Whitaker RC. (2004). Predicting preschooler obesity at birth: the role of maternal  
773 obesity in early pregnancy. *Pediatrics* **114**, e29-36.
- 774
- 775 World Health Organisation. (2004). Department of Mental Health and Substance  
776 Abuse: Alcohol Policy. Geneva.
- 777
- 778 Xia L, Shen L, Kou H, Zhang B, Zhang L, Wu Y, Li X, Xiong J, Yu Y & Wang H.  
779 (2014). Prenatal ethanol exposure enhances the susceptibility to metabolic  
780 syndrome in offspring rats by HPA axis-associated neuroendocrine metabolic  
781 programming. *Toxicol Lett* **226**, 98-105.
- 782

- 783 Yao X-H, Nguyen HK & Nyomba BG. (2013). Prenatal ethanol exposure causes  
784 glucose intolerance with increased hepatic gluconeogenesis and histone  
785 deacetylases in adult rat offspring: reversal by tauroursodeoxycholic acid. *PLoS*  
786 *one* **8**, e59680.  
787
- 788 Yao XH, Chen L & Nyomba BL. (2006). Adult rats prenatally exposed to ethanol have  
789 increased gluconeogenesis and impaired insulin response of hepatic  
790 gluconeogenic genes. *J Appl Physiol* **100**, 642-648.  
791
- 792 Yao XH & Nyomba BLG. (2008). Hepatic insulin resistance induced by prenatal  
793 alcohol exposure is associated with reduced PTEN and TRB3 acetylation in  
794 adult rat offspring. *American journal of physiology Regulatory, integrative and*  
795 *comparative physiology* **294**, R1797-R1806.  
796
- 797 Zhang CR, Kurniawan ND, Yamada L, Fleming W, Kaminen-Ahola N, Ahola A,  
798 Galloway G & Chong S. (2018). Early gestational ethanol exposure in mice:  
799 Effects on brain structure, energy metabolism and adiposity in adult offspring.  
800 *Alcohol (Fayetteville, NY)* **75**, 1-10.  
801  
802

803 **Figure legends**

804 **Figure 1: Comparison of blood glucose concentrations measured by glucometer**  
805 **and plasma glucose concentrations measured by Cobas analyser.** Dual-analysis was  
806 conducted on  $n = 8-9$  per sex per group (see Supplemental Data 1 for details  
807 <https://doi.org/10.5281/zenodo.3257092>). (A) Bland-Altman plot to visualise the  
808 difference in the glucometer and Cobas readings versus the average of the readings. (B)  
809 Comparison of glucose levels across each treatment/sex group by method. White bars  
810 indicate control and black bars indicate EtOH-exposed animals within each sex. Data  
811 analysed using a two-way ANOVA, with treatment/sex (Control Male, EtOH Male,  
812 Control Female, EtOH Female) and method (glucometer/Cobas) as factors.

813 **Figure 2: Effect of prenatal alcohol exposure on fasting plasma glucose and plasma**  
814 **insulin levels in adult offspring.** Offspring were prenatally exposed to ethanol (grey)  
815 or saline control (white). (A) Fasting plasma glucose and (B) plasma insulin were  
816 measured at 6 months of age. Corresponding homeostatic model assessment of insulin  
817 resistance (HOMA-IR) (C) and quantitative insulin-sensitivity check index (QUICKI)  
818 (D) were calculated. Data are presented as mean  $\pm$  SEM.  $n = 7-9$  per sex per group (see  
819 Supplemental Data 1 for details <https://doi.org/10.5281/zenodo.3257092>). Data for A)  
820 and B) were analysed with two-way ANOVA; while data for C) and D) were analysed  
821 using a non-parametric Kruskal-Wallis test due to non-normal data distribution  
822 (indicated by ^). \*\* = significantly different to control male by Sidak's multiple  
823 comparison post-hoc procedure.

824 **Figure 3: Effect of prenatal alcohol exposure on glucose clearing and insulin**  
825 **sensitivity.** Offspring were prenatally exposed to ethanol (grey) or saline (white). (A)  
826 Blood glucose concentration curve during a glucose tolerance test (GTT); (B) area  
827 under the glucose curve (AUGC) generated from the GTT; (C) plasma insulin secretion  
828 during the GTT; (D) area under the insulin curve (AUIC) generated from the GTT; (E)  
829 AUIC for 1<sup>st</sup> phase insulin secretion; and (F) AUIC for 2<sup>nd</sup> phase insulin secretion. (G)  
830 Blood glucose concentrations following an insulin tolerance test (ITT) and (H) AUGC  
831 from inverted ITT curves. Control males (white circles), ethanol males (black circles),  
832 control females (white squares) and ethanol females (black squares) (A, C, G). Data  
833 represented as mean  $\pm$  SEM;  $n = 8-9$  per group (see Supplemental Data 1 for details  
834 <https://doi.org/10.5281/zenodo.3257092>). Data were analysed with two-way ANOVA

835 (B, D, E, F, H). \*\* indicates  $P < 0.01$ , where significance was determined by Sidak's  
836 post-hoc analysis.

837 **Figure 4: Effect of prenatal alcohol on insulin signalling and glucose transport in**  
838 **skeletal muscle of male offspring at 6 months of age.** (A-E) AKT protein levels and  
839 phosphorylation state, expressed relative to GAPDH. (F) *Glut4* and (G) *Insr* gene  
840 expression, expressed relative to the geometric mean of *Actb* and *Rpl19*. Offspring were  
841 prenatally exposed to ethanol (grey) or saline (white). Data represented as mean  $\pm$  SEM;  
842  $n = 7-9$  per group (see Supplemental Data 1 for details  
843 <https://doi.org/10.5281/zenodo.3257092>). Data were analysed with an unpaired t-test  
844 (normally distributed data) or a Mann-Whitney U-test (non-normal distribution,  
845 indicated by ^).

846 **Figure 5: Effect of prenatal alcohol on insulin signalling in adipose tissue of male**  
847 **offspring at 6 months of age.** (A) pan-AKT protein levels; (B) pAKT<sub>Ser473</sub>; (C)  
848 pAKT<sub>Thr308</sub>; (D-E) pAKT relative to pan-AKT. All are expressed relative to GAPDH.  
849 Offspring were prenatally exposed to ethanol (grey) or saline (white). Data represented  
850 as mean  $\pm$  SEM;  $n = 7$  per group (see Supplemental Data 1 for details  
851 <https://doi.org/10.5281/zenodo.3257092>). Data were analysed with an unpaired t-test  
852 (normally distributed data) or a Mann-Whitney U-test (non-normal distribution,  
853 indicated by ^).

854

**Table 1: Primers used for real-time quantitative PCR analysis of metabolic gene expression.** All primers were Assay-on-Demand primer/probe sets from ThermoFisher Scientific (Richlands, QLD, Australia). \* Endogenous control.

| Gene name                                                                                   | Gene symbol           | Assay ID      | Amplicon size (bp) | Accession number(s)                             |
|---------------------------------------------------------------------------------------------|-----------------------|---------------|--------------------|-------------------------------------------------|
| Beta actin*                                                                                 | <i>Actb</i>           | Cat #4351319  | 61                 | NM_031144.3                                     |
| Eukaryotic translation initiation factor 2A*                                                | <i>Eif2a</i>          | Rn01494813_m1 | 82                 | NM_001109339.1                                  |
| Glucose-6-phosphatase, catalytic subunit                                                    | <i>G6pc</i>           | Rn00689876_m1 | 64                 | NM_013098.2                                     |
| Glucokinase                                                                                 | <i>Gck</i>            | Rn00561265_m1 | 58                 | NM_001270849.1<br>NM_001270850.1<br>NM_012565.2 |
| Glucose transporter 2 [solute carrier family 2 (facilitated glucose transporter), member 2] | <i>Glut2 (Slc2a2)</i> | Rn00563565_m1 | 76                 | NM_012879.2                                     |
| Glucose transporter 4                                                                       | <i>Glut4</i>          | Rn00562597_m1 | 75                 | NM_012751.1                                     |
| Insulin receptor                                                                            | <i>Insr</i>           | Rn01403321_m1 | 76                 | NM_017071.2                                     |
| Phosphoenolpyruvate carboxykinase 1                                                         | <i>Pck1</i>           | Rn01529014_m1 | 87                 | NM_198780.3                                     |
| Peroxisome proliferator-activated receptor gamma, coactivator 1 alpha                       | <i>Ppargc1a</i>       | Rn00580241_m1 | 94                 | NM_031347.1                                     |
| Ribosomal protein L19*                                                                      | <i>Rpl19</i>          | Rn00821265_g1 | 57                 | NM_031103.1                                     |

**Table 2: Maternal parameters for dams treated with saline (Control) or ethanol (EtOH).** All animals treated by oral gavage on embryonic day 13.5 and 14.5.

| Maternal parameters                       | Treatment group    |                     | P value |
|-------------------------------------------|--------------------|---------------------|---------|
|                                           | Control<br>(n = 8) | EtOH<br>(n = 10)    |         |
| Body weight when mated (g)                | 251 ± 4            | 255 ± 4             | 0.61    |
| Body weight at E13.5 (g)                  | 310 ± 5            | 312 ± 5             | 0.77    |
| Total weight gain (g)*                    | 152 ± 9            | 148 ± 5             | 0.98    |
| Pre-gavage (mating to E12.5)              | 59 ± 3             | 58 ± 4              | 0.85    |
| Post-gavage (E15.5 to birth)              | 91 ± 6             | 89 ± 5              | 0.77    |
| H <sub>2</sub> O consumption (mL/day)     |                    |                     |         |
| Pre-gavage (E12.5)                        | 31.9 ± 1.7         | 29.6 ± 1.8          | 0.37    |
| During gavage (E13.5-E14.5)               | 25.8 ± 1.3         | 25.3 ± 1.4          | 0.79    |
| Post-gavage (E15.5 to birth)              | 36.9 ± 1.1         | 34.8 ± 1.6          | 0.33    |
| Chow consumption (g/day)                  |                    |                     |         |
| Pre-gavage (E12.5)                        | 24.7 ± 1.2         | 24.4 ± 0.8          | 0.79    |
| During gavage (E13.5-E14.5)               | 20.9 ± 1.0         | 20.4 ± 1.0          | 0.70    |
| Post-gavage (E15.5 to birth)              | 26.6 ± 0.7         | 26.0 ± 0.9          | 0.61    |
| Blood glucose (mmol/L)                    |                    |                     |         |
| 1h post E13.5 gavage*                     | 5.8 ± 0.2          | 6.1 ± 0.2           | 0.13    |
| 5h post E13.5 gavage                      | 5.9 ± 0.1          | 6.1 ± 0.2           | 0.38    |
| 1h post E14.5 gavage                      | 5.7 ± 0.2          | 6.0 ± 0.1           | 0.09    |
| 5h post E14.5 gavage*                     | 6.2 ± 0.2          | 6.0 ± 0.1           | 0.62    |
| Litter sex ratio (M:F)                    | 1.1 ± 0.2          | 1.2 ± 0.2           | 0.78    |
| Litter size                               | 15 <sup>†</sup>    | 14 <sup>†</sup>     | 0.47    |
| Number of implantation scars*             | 16 <sup>†</sup>    | 15 ± 1 <sup>†</sup> | 0.99    |
| Blood alcohol concentration (BAC) (mg/dL) |                    |                     |         |
| 1h post E13.5 gavage                      | <LD <sup>‡</sup>   | 48.2 ± 7.5          | -       |
| 5h post E13.5 gavage                      | <LD <sup>‡</sup>   | <LD                 | -       |
| 1h post E14.5 gavage                      | <LD <sup>‡</sup>   | 52.9 ± 4.5          | -       |
| 5h post E14.5 gavage                      | <LD <sup>‡</sup>   | <LD                 | -       |



Data are presented as mean  $\pm$  SEM. *P* values were obtained using an unpaired Student's *t*-test.

<LD = below the limit of detection; E = embryonic day; EtOH = ethanol; M = male; F = female.

\* Indicates data not normally distributed and analysed with a non-parametric Mann-Whitney U-test.

† Denotes parameters expressed as whole pups/scars.

‡ Measured in 4 animals only.

**Table 3: Postnatal weight and growth of offspring from saline (Control) and ethanol (EtOH) treated litters during the first month.**

All offspring from dams treated by oral gavage at embryonic day 13.5 and 14.5. Weights at PN1 and PN30 are total body weight (g). At other ages, total weight gain over the specific age ranges are shown (g).

|                   | Male                       |                         | Female                     |                         | Statistics                |                           |                           |
|-------------------|----------------------------|-------------------------|----------------------------|-------------------------|---------------------------|---------------------------|---------------------------|
|                   | Control<br>( <i>n</i> = 8) | EtOH<br>( <i>n</i> = 9) | Control<br>( <i>n</i> = 8) | EtOH<br>( <i>n</i> = 9) | <i>P</i> <sub>(trt)</sub> | <i>P</i> <sub>(sex)</sub> | <i>P</i> <sub>(int)</sub> |
| Age               |                            |                         |                            |                         |                           |                           |                           |
| PN1*              | 6.6 ± 0.1                  | 7.0 ± 0.3               | 6.4 ± 0.1                  | 6.7 ± 0.3               | 0.15                      | 0.32                      | 0.84                      |
| PN1-10            | 10.2 ± 0.4                 | 10.5 ± 0.5              | 10.0 ± 0.3                 | 10.3 ± 0.5              | 0.50                      | 0.60                      | 0.95                      |
| PN11-21           | 16.4 ± 0.5                 | 17.9 ± 1.2              | 15.6 ± 0.5                 | 17.4 ± 1.2              | 0.11                      | 0.51                      | 0.89                      |
| PN21-28           | 31.9 ± 0.8                 | 33.4 ± 2.2              | 29.4 ± 0.6                 | 29.6 ± 1.0              | 0.54                      | 0.03                      | 0.66                      |
| PN30 <sup>†</sup> | 73.1 ± 1.3                 | 74.1 ± 3.6              | 67.2 ± 2.0                 | 62.6 ± 4.4              | 0.89                      | 0.70                      | 0.69                      |

Data are presented as mean ± SEM, with littermates averaged. *P* values were obtained using a two-way ANOVA, with treatment (Control/EtOH) and sex (male/female) as factors.

EtOH = ethanol; int = interaction; PN = postnatal day; trt = treatment.

\* Birth weight was not recorded at PN0 to minimise disturbance to litters.

<sup>†</sup> Only a subset of the litters were weighed prior to cull (3-8 per treatment); see Supplemental Data 1 for details (<https://doi.org/10.5281/zenodo.3257092>); total body weight shown at this age.

**Table 4: Effect of prenatal ethanol exposure on fasting blood glucose, plasma insulin and plasma lipid levels in adolescent offspring.** Offspring were prenatally exposed to ethanol (EtOH) or saline (control) at embryonic day 13.5 and 14.5. All parameters were measured at postnatal day 30.

| Parameters                         | Male                       |                         | Females                    |                         | Statistics                |                           |                           |
|------------------------------------|----------------------------|-------------------------|----------------------------|-------------------------|---------------------------|---------------------------|---------------------------|
|                                    | Control<br>( <i>n</i> = 6) | EtOH<br>( <i>n</i> = 8) | Control<br>( <i>n</i> = 3) | EtOH<br>( <i>n</i> = 3) | <i>P</i> <sub>(trt)</sub> | <i>P</i> <sub>(sex)</sub> | <i>P</i> <sub>(int)</sub> |
| Fasting blood glucose (mmol/L)     | 5.6 ± 0.2                  | 5.9 ± 0.2               | 6.1 ± 0.2                  | 5.9 ± 0.1               | 0.64                      | 0.69                      | 0.83                      |
| Fasting plasma insulin (ng/mL)     | 0.55 ± 0.07                | 0.65 ± 0.06             | 0.64 ± 0.11                | 0.63 ± 0.07             | 0.58                      | 0.67                      | 0.53                      |
| HOMA-IR                            | 0.71 ± 0.11                | 0.81 ± 0.07             | 0.83 ± 0.15                | 0.79 ± 0.07             | 0.78                      | 0.65                      | 0.54                      |
| QUICKI                             | 0.31 ± 0.007               | 0.30 ± 0.003            | 0.30 ± 0.007               | 0.30 ± 0.003            | 0.55                      | 0.50                      | 0.50                      |
| Plasma HDL (mmol/L)                | 1.07 ± 0.15                | 0.98 ± 0.21             | 0.87 ± 0.16                | 0.80 ± 0.18             | 0.73                      | 0.41                      | 0.95                      |
| Plasma LDL (mmol/L)                | 0.43 ± 0.06                | 0.46 ± 0.04             | 0.52 ± 0.07                | 0.33 ± 0.01             | 0.26                      | 0.80                      | 0.11                      |
| Plasma triglycerides (mmol/L)      | 0.92 ± 0.10                | 1.09 ± 0.21             | 0.83 ± 0.20                | 0.78 ± 0.14             | 0.53                      | 0.22                      | 0.99                      |
| Plasma total cholesterol (mmol/L)* | 1.68 ± 0.18                | 1.65 ± 0.23             | 1.55 ± 0.20                | 1.29 ± 0.16             | 0.59                      | 0.35                      | 0.65                      |

Data presented as mean ± SEM, with 1 male and/or 1 female used per litter (*n*=3-8 litters per group). Sample sizes were lower than the number of dams treated due to availability of animals of each sex for each parameter measured (see Supplemental Data 1 for details <https://doi.org/10.5281/zenodo.3257092>). *P* values were obtained using a two-way ANOVA, with treatment (Control/EtOH) and sex (male/female) as factors. *P*<0.05 was considered significant.

EtOH = ethanol; HDL = high density lipoprotein; HOMA-IR = homeostatic model assessment of insulin resistance; int = interaction; LDL = low density lipoprotein; QUICKI = quantitative insulin-sensitivity check index; trt = treatment.

\* Calculated using HDL + LDL + (triglycerides/5).

**Table 5: Offspring food and water consumption throughout the food preference study.** All animals were housed individually and acclimatised to the study cage for 4 days. Following acclimatisation, baseline measurements of standard chow diet (SD) and water were conducted over days 1-4. A choice of high fat diet (HFD) or SD was then offered for the next 4 days, divided into choice period (CP)1 (days 5-6) and CP2 (days 7-8).

| Parameter                                                      | Male               |                 | Female             |                             | Statistics  |              |             |
|----------------------------------------------------------------|--------------------|-----------------|--------------------|-----------------------------|-------------|--------------|-------------|
|                                                                | Control<br>(n = 8) | EtOH<br>(n = 9) | Control<br>(n = 8) | EtOH<br>(n = 9)             | $P_{(trt)}$ | $P_{(sex)}$  | $P_{(int)}$ |
| <b><i>H<sub>2</sub>O consumption (mL/g BW/day)</i></b>         |                    |                 |                    |                             |             |              |             |
| Baseline                                                       | 0.064 ± 0.006      | 0.060 ± 0.002   | 0.070 ± 0.005      | 0.082 ± 0.005               | 0.34        | 0.007        | 0.12        |
| CP1                                                            | 0.049 ± 0.004      | 0.047 ± 0.002   | 0.058 ± 0.011      | 0.068 ± 0.004               | 0.37        | <0.001       | 0.19        |
| CP2*                                                           | 0.046 ± 0.003      | 0.049 ± 0.003   | 0.055 ± 0.003      | 0.070 ± 0.004 <sup>^^</sup> |             | $P = 0.0004$ |             |
| <b><i>Standard chow diet (SD) consumption (g/g BW/day)</i></b> |                    |                 |                    |                             |             |              |             |
| Baseline                                                       | 0.047 ± 0.001      | 0.046 ± 0.001   | 0.053 ± 0.002      | 0.054 ± 0.001               | 0.99        | <0.001       | 0.51        |
| CP1                                                            | 0.007 ± 0.003      | 0.005 ± 0.001   | 0.008 ± 0.004      | 0.003 ± 0.003               | 0.25        | 0.92         | 0.63        |
| CP2                                                            | 0.019 ± 0.005      | 0.017 ± 0.003   | 0.010 ± 0.004      | 0.013 ± 0.003               | 0.87        | 0.11         | 0.44        |
| <b><i>High fat diet (HFD) consumption (g/g BW/day)</i></b>     |                    |                 |                    |                             |             |              |             |
| CP1                                                            | 0.055 ± 0.004      | 0.055 ± 0.003   | 0.077 ± 0.006      | 0.072 ± 0.004               | 0.54        | <0.0001      | 0.64        |
| CP2                                                            | 0.046 ± 0.004      | 0.043 ± 0.004   | 0.067 ± 0.004      | 0.060 ± 0.004               | 0.27        | <0.0001      | 0.61        |
| <b><i>Energy intake (kJ/day)</i></b>                           |                    |                 |                    |                             |             |              |             |
| Baseline                                                       | 357.8 ± 8.4        | 348.3 ± 10.3    | 230.4 ± 10.4       | 222.1 ± 6.5                 | 0.33        | <0.0001      | 0.95        |
| CP1                                                            | 628.3 ± 20.6       | 605.8 ± 26.9    | 502.2 ± 27.1       | 430.4 ± 20.1                | 0.06        | <0.0001      | 0.31        |
| CP2                                                            | 579.8 ± 25.6       | 538.5 ± 26.6    | 457.1 ± 22.5       | 396.0 ± 17.6                | 0.04        | <0.0001      | 0.67        |

Data are presented as mean  $\pm$  SEM. *n* numbers are from 1 male and 1 female per litter. *P* values were obtained using a two-way ANOVA, with treatment (Control/EtOH) and sex (male/female) as factors.

\* Indicates data not normally distributed and analysed with a non-parametric Kruskal-Wallis Test. ^^ Indicates significantly different to corresponding group in males ( $P=0.006$ ) from Dunns multiple comparison procedure. CP = choice period; HFD = high-fat diet; BW = body weight.

**Table 6: Body condition and organ weights of offspring from saline (Control) and ethanol (EtOH) treated litters at 6 months of age.** Offspring were prenatally exposed to ethanol (EtOH) or saline (control) at embryonic day 13.5 and 14.5.

| Parameters                                            | Male                |                  | Females                   |                           | Statistics                |                           |                           |
|-------------------------------------------------------|---------------------|------------------|---------------------------|---------------------------|---------------------------|---------------------------|---------------------------|
|                                                       | Control<br>(n = 12) | EtOH<br>(n = 12) | Control<br>(n = 12)       | EtOH<br>(n = 12)          | <i>P</i> <sub>(trt)</sub> | <i>P</i> <sub>(sex)</sub> | <i>P</i> <sub>(int)</sub> |
| Body weight (g)                                       | 618 ± 25            | 600 ± 16         | 345 ± 13                  | 328 ± 7                   | 0.29                      | <0.0001                   | 0.99                      |
| Abdominal circumference (cm)                          | 24.7 ± 0.7          | 24.0 ± 0.4       | 19.8 ± 0.5                | 19.1 ± 0.3                | 0.16                      | <0.0001                   | 0.97                      |
| Snout-rump length (cm)                                | 28.7 ± 0.3          | 28.7 ± 0.2       | 24.5 ± 0.2                | 24.6 ± 0.2                | 0.82                      | <0.0001                   | 0.66                      |
| Tibia length (cm)                                     | 6.07 ± 0.05         | 6.09 ± 0.04      | 5.32 ± 0.04               | 5.28 ± 0.05               | 0.89                      | <0.0001                   | 0.52                      |
| Ponderal index (g/cm <sup>3</sup> )*                  | 26.0 ± 0.5          | 25.6 ± 0.9       | 23.5 ± 0.7                | 22.0 ± 0.4                | 0.15                      | <0.0001                   | 0.38                      |
| Abdominal circumference:<br>snout-rump length (cm/cm) | 0.86 ± 0.02         | 0.84 ± 0.02      | 0.81 ± 0.02               | 0.78 ± 0.01               | 0.09                      | <0.001                    | 0.61                      |
| Abdominal circumference:<br>tibia length (cm/cm)      | 0.41 ± 0.01         | 0.40 ± 0.01      | 0.37 ± 0.01               | 0.36 ± 0.01               | 0.26                      | <0.001                    | 0.89                      |
| Liver weight (g)                                      | 22.24 ± 1.20        | 20.68 ± 0.74     | 11.47 ± 0.40              | 10.41 ± 0.21              | 0.08                      | <0.0001                   | 0.74                      |
| Liver:BW ratio (mg/g)                                 | 35.91 ± 0.80        | 34.44 ± 0.60     | 33.41 ± 0.94              | 31.91 ± 0.81              | 0.07                      | 0.003                     | 0.99                      |
| Pancreas weight (g)                                   | 1.00 ± 0.06         | 0.95 ± 0.06      | 0.77 ± 0.03               | 0.71 ± 0.03               | 0.22                      | <0.001                    | 0.92                      |
| Pancreas:BW ratio (mg/g) <sup>†</sup>                 | 1.63 ± 0.07         | 1.60 ± 0.12      | 2.24 ± 0.10 <sup>^^</sup> | 2.17 ± 0.11 <sup>^^</sup> | <i>P</i> <0.0001          |                           |                           |

Data are presented as mean ± SEM. *n*=12 per group, as 1-2 rats per sex per litter (across 8 control litters and 9 EtOH litters). *P* values were obtained using a two-way ANOVA, with treatment (Control/EtOH) and sex (male/female) as factors.

BW = body weight.

\* Ponderal index calculated as body weight (g) divided by snout-rump length cubed (cm<sup>3</sup>).

<sup>†</sup> Indicates data not normally distributed and analysed with a non-parametric Kruskal-Wallis Test. <sup>^^</sup> Indicates significantly different to corresponding group in males (*P*<0.001) from Dunns multiple comparison procedure.

**Table 7: Expression of hepatic genes involved in glucose and insulin signalling.** Offspring were prenatally exposed to ethanol (EtOH) or saline (control) at embryonic day 13.5 and 14.5. Liver tissue was collected at 6 months of age.

| Gene of Interest                             | Male               |                 | Females            |                 | Statistics                |                           |                           |
|----------------------------------------------|--------------------|-----------------|--------------------|-----------------|---------------------------|---------------------------|---------------------------|
|                                              | Control<br>(n = 8) | EtOH<br>(n = 9) | Control<br>(n = 8) | EtOH<br>(n = 9) | <i>P</i> <sub>(trt)</sub> | <i>P</i> <sub>(sex)</sub> | <i>P</i> <sub>(int)</sub> |
| <b><i>Glucose transport</i></b>              |                    |                 |                    |                 |                           |                           |                           |
| <i>Glut2</i>                                 | 1.00 ± 0.05        | 0.93 ± 0.07     | 1.15 ± 0.08        | 1.10 ± 0.12     | 0.51                      | 0.08                      | 0.93                      |
| <b><i>Gluconeogenesis and glycolysis</i></b> |                    |                 |                    |                 |                           |                           |                           |
| <i>G6pc</i>                                  | 1.00 ± 0.17        | 0.69 ± 0.16     | 0.94 ± 0.14        | 0.75 ± 0.14     | 0.12                      | 0.98                      | 0.70                      |
| <i>Gck</i> *                                 | 1.00 ± 0.17        | 0.75 ± 0.18     | 0.70 ± 0.16        | 0.53 ± 0.06     | <i>P</i> = 0.26           |                           |                           |
| <i>Pck1</i>                                  | 1.00 ± 0.15        | 1.20 ± 0.13     | 0.80 ± 0.10        | 1.08 ± 0.18     | 0.10                      | 0.26                      | 0.80                      |
| <i>Ppargc1a</i> *                            | 1.00 ± 0.16        | 0.96 ± 0.20     | 2.01 ± 0.15        | 2.40 ± 0.33^^   | <i>P</i> = 0.001          |                           |                           |
| <b><i>Insulin signalling</i></b>             |                    |                 |                    |                 |                           |                           |                           |
| <i>Insr</i>                                  | 1.00 ± 0.08        | 0.97 ± 0.08     | 1.47 ± 0.15        | 1.42 ± 0.17     | 0.74                      | <0.001                    | 0.95                      |

Data are presented as mean ± SEM. *P* values were obtained using a two-way ANOVA, with treatment (Control/EtOH) and sex (male/female) as factors.

\* Indicates data not normally distributed and analysed with a non-parametric Kruskal-Wallis Test. ^^ Indicates significantly different to corresponding group in males (*P*=0.008) from Dunns multiple comparison procedure.

Figure 1

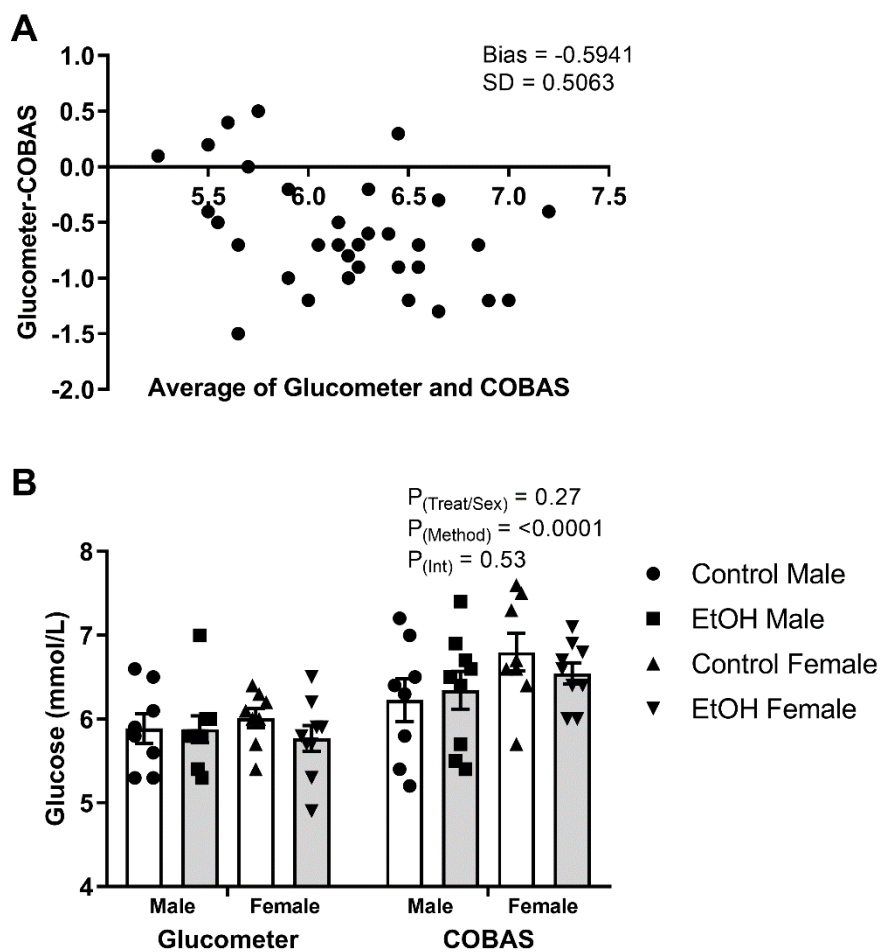



Figure 2

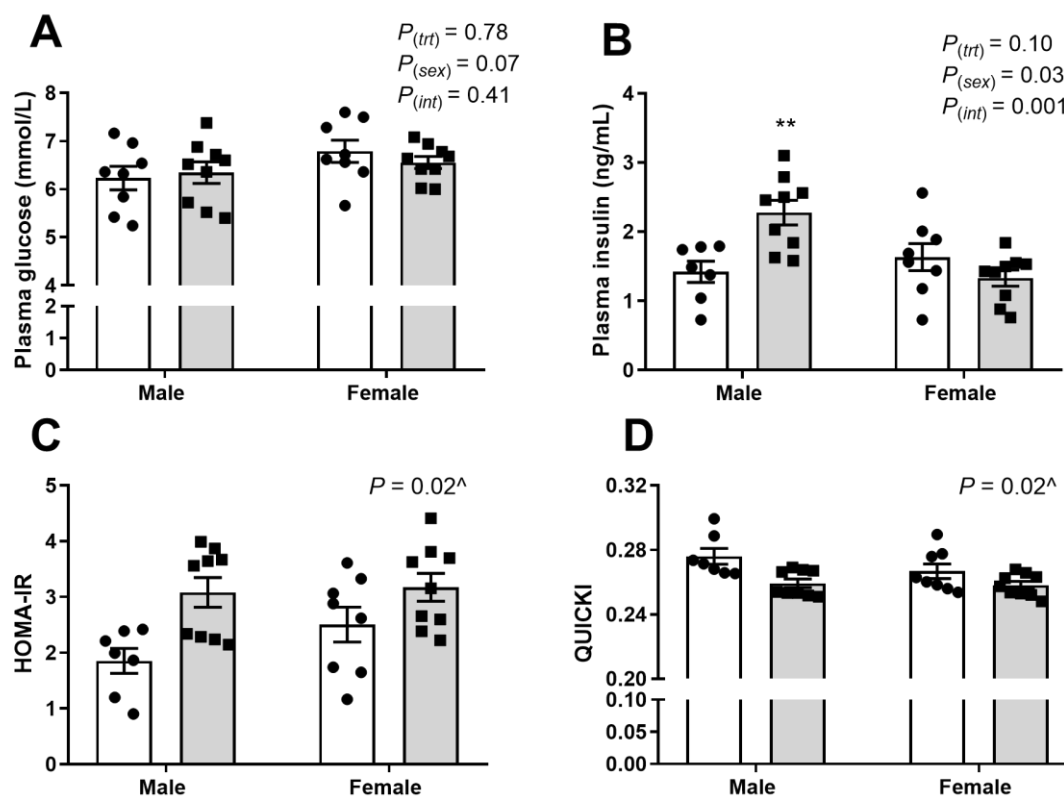

Figure 3

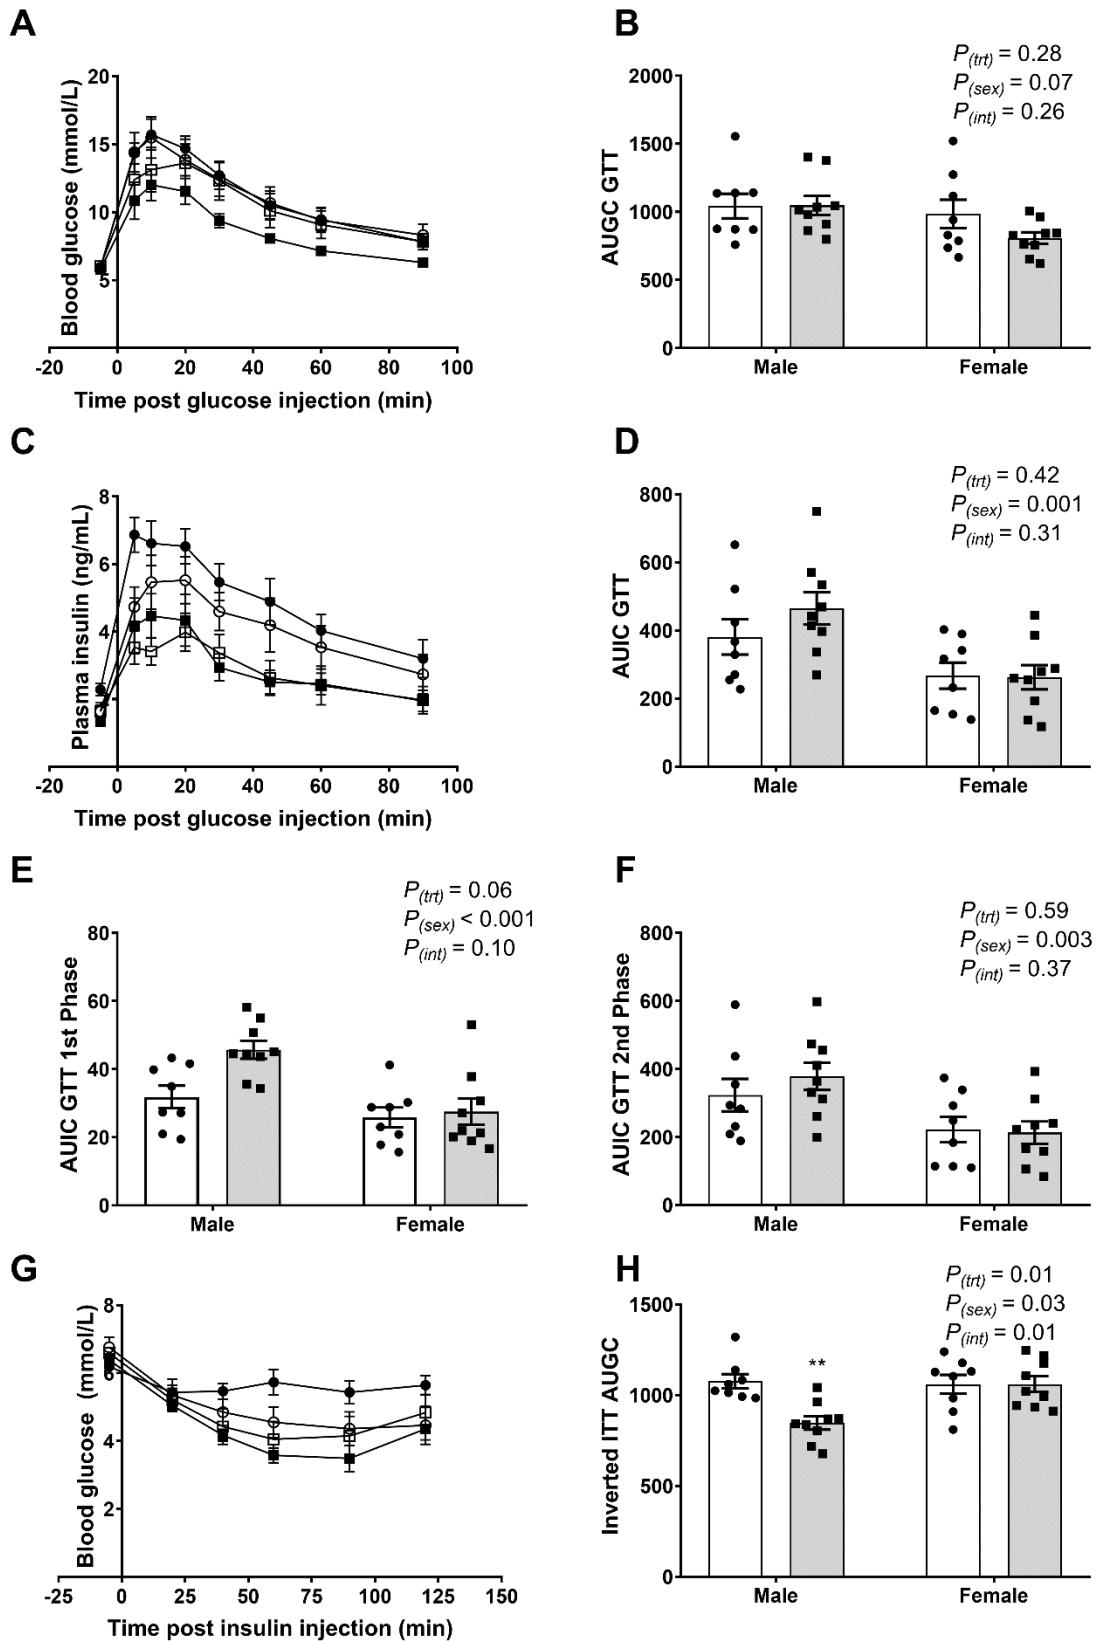

Figure 4

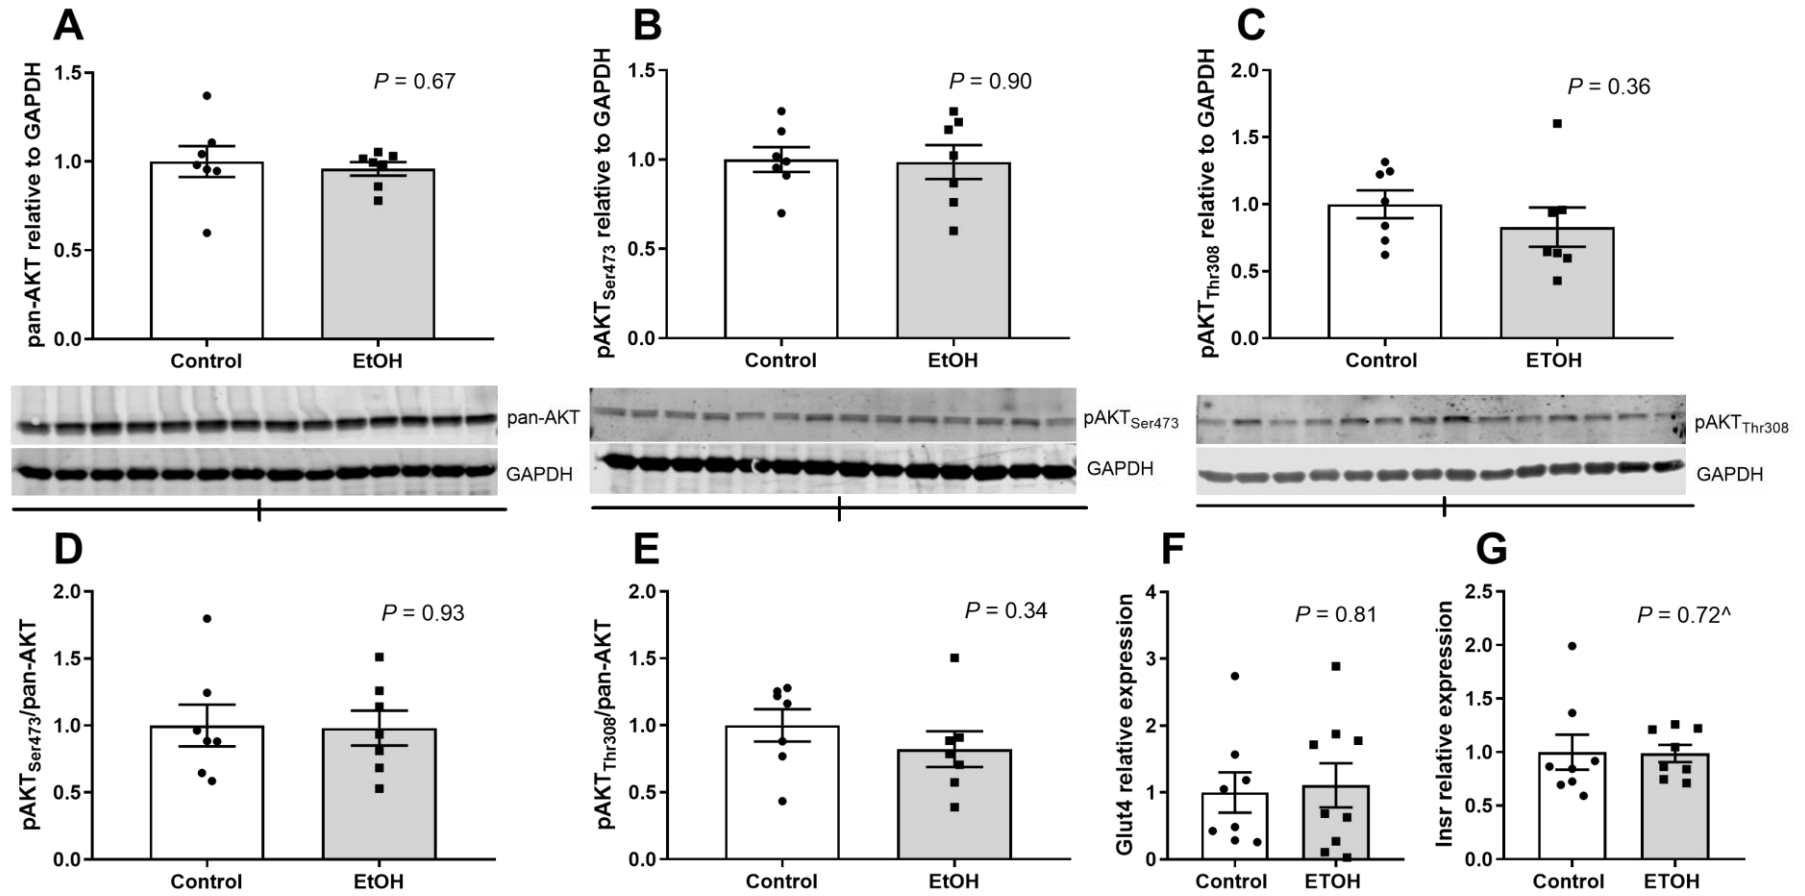

Figure 5

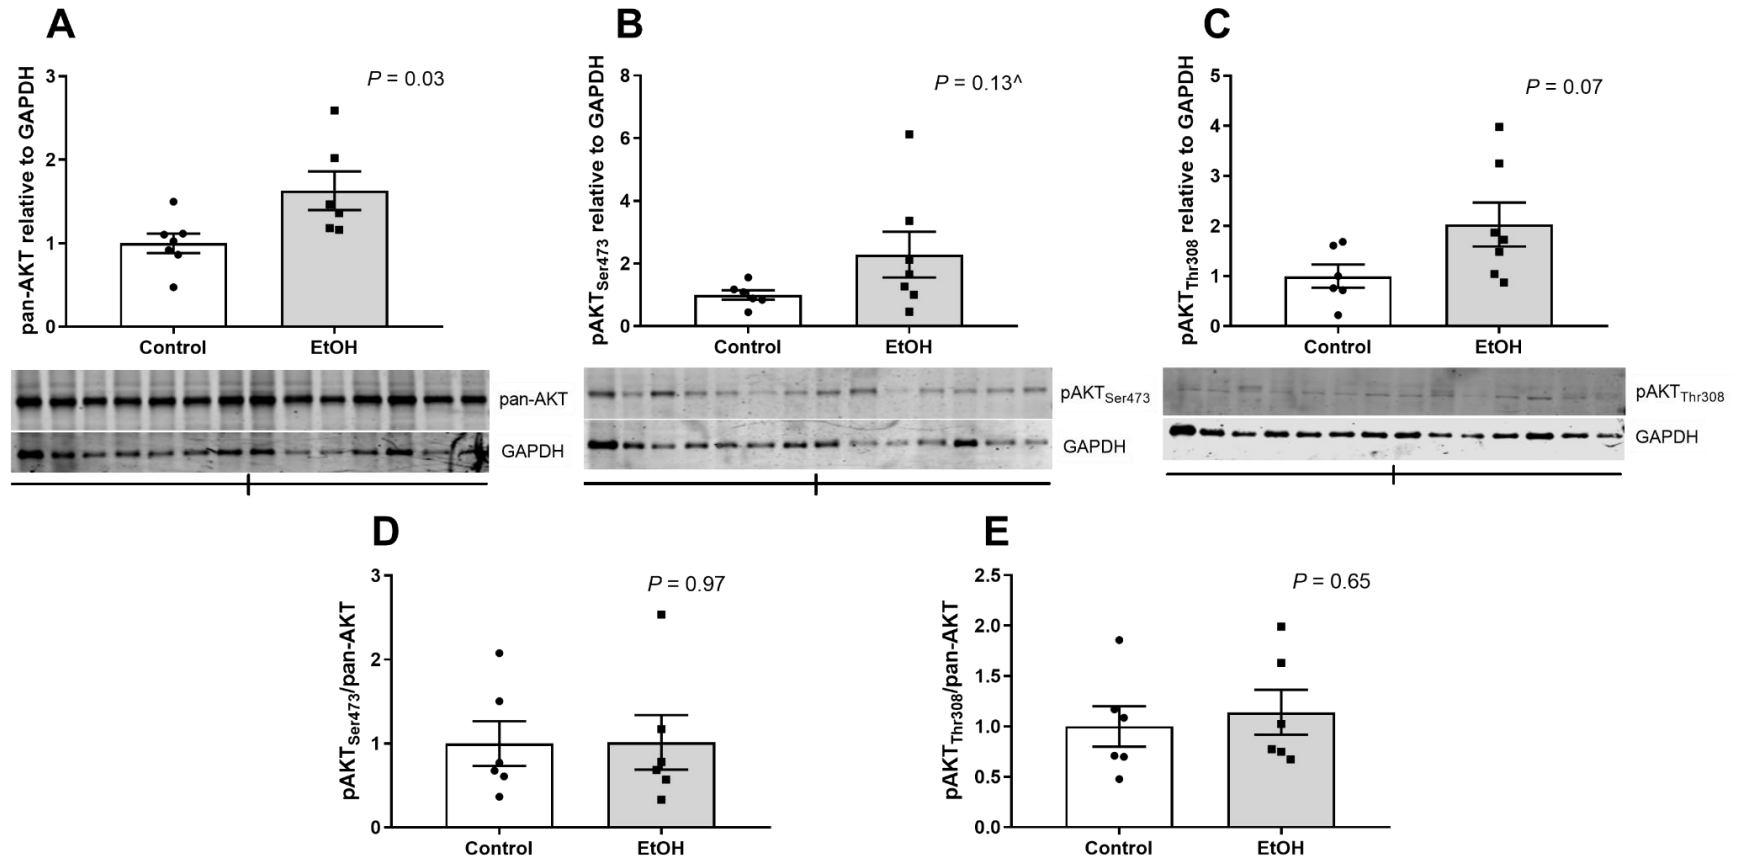

Source: https://www.biorxiv.org/content/10.1101/684639v1.full.pdf
